1 **Comparative genomics of *Mycobacterium africanum* Lineage 5 and Lineage 6 from Ghana**  
2 **suggests different ecological niches.**

3

4 **Authors:**

5 Isaac Darko Otchere<sup>1,2γ</sup>, Mireia Coscollá<sup>3,4γ</sup>, Leonor Sánchez-Busó<sup>5</sup>, Adwoa Asante-Poku<sup>1</sup>, Daniela  
6 Brites<sup>3,4</sup>, Chloe Loiseau<sup>3,4</sup>, Conor Meehan<sup>6</sup>, Stephen Osei-Wusu<sup>1</sup>, Audrey Forson<sup>7</sup>, Clement  
7 Laryea<sup>8</sup>, Abdallah Iddrisu Yahayah<sup>9</sup>, Akosua Baddoo<sup>7</sup>, Gloria Akosua Ansa<sup>10</sup> Samuel Yaw  
8 Aboagye<sup>1</sup>, Prince Asare<sup>1</sup>, Sonia Borrell<sup>3,4</sup>, Florian Gehre<sup>6,11</sup>, Patrick Beckett<sup>12,13</sup>, Thomas A  
9 Kohl<sup>12,13</sup>, Sanoussi N'dira<sup>14</sup>, Christian Beisel<sup>15</sup>, Martin Antonio<sup>11</sup>, Stefan Niemann<sup>12,13</sup>, Bouke C de  
10 Jong<sup>6,11</sup>, Julian Parkhill<sup>5</sup>, Simon R Harris<sup>5</sup>, Sebastien Gagneux<sup>3,4\*</sup>, Dorothy Yeboah-Manu<sup>1\*</sup>.

11

12 **Author Affiliations:**

13 <sup>1</sup>Noguchi Memorial Institute for Medical Research, University of Ghana, Legon, Accra, Ghana.

14 <sup>2</sup>Department of Biochemistry, Cell and Molecular Biology, University of Ghana, Legon, Accra,  
15 Ghana.

16 <sup>3</sup>Swiss Tropical and Public Health Institute, Basel, Switzerland.

17 <sup>4</sup>University of Basel, Basel, Switzerland.

18 <sup>5</sup>Wellcome Trust Sanger Institute, University of Cambridge, Hinxton, United Kingdom.

19 <sup>6</sup>Institute of Tropical Medicine, Antwerp, Belgium

20 <sup>7</sup>Chest Clinic, Korle-Bu Teaching Hospital, Accra, Ghana.

21 <sup>8</sup>37 Military Hospital, Accra, Ghana.

22 <sup>9</sup>Chest Department, Tamale Teaching Hospital, Tamale, Ghana.

23 <sup>10</sup>Public Health Department, University of Ghana Hospital, Legon, Accra, Ghana

24 <sup>11</sup>Medical Research Council, The Gambia Unit, Gambia

25 <sup>12</sup>Molecular and Experimental Mycobacteriology, Research Center Borstel, Borstel, Germany

26 <sup>13</sup>Germany German Center for Infection Research, Partner Site Hamburg-Borstel-Lübeck, Germany

27 <sup>14</sup>National Reference Laboratory for Mycobacteria, Cotonou, Benin

28 <sup>15</sup>Department of Biosystems Science and Engineering, ETH Zurich, Basel, Switzerland.

29

30

31 \*These authors contributed equally

32 <sup>†</sup>These authors contributed equally

33

34 Correspondence should be addressed to: DYM ([dyboah-Manu@noguchi.ug.edu.gh](mailto:dyboah-Manu@noguchi.ug.edu.gh))

35 and SG ([sebastien.gagneux@unibas.ch](mailto:sebastien.gagneux@unibas.ch))

36

37 **Abstract:**

38 *Mycobacterium africanum* (*Maf*) causes up to half of human tuberculosis in West Africa, but little is  
39 known on this pathogen. We compared the genomes of 253 *Maf* clinical isolates from Ghana,  
40 including both L5 and L6. We found that the genomic diversity of L6 was higher than in L5, and  
41 the selection pressures differed between both groups. Regulatory proteins appeared to evolve  
42 neutrally in L5 but under purifying selection in L6. Conversely, human T cell epitopes were under  
43 purifying selection in L5, but under positive selection in L6. Although only 10% of the T cell  
44 epitopes were variable, mutations were mostly lineage-specific. Our findings indicate that *Maf* L5  
45 and L6 are genomically distinct, possibly reflecting different ecological niches.

46

47

48 **Introduction:**

49 The global phylogeography of the human-adapted *Mycobacterium tuberculosis* complex (MTBC)  
50 demonstrates highest diversity in West Africa, with six out of the seven known lineages  
51 represented<sup>1,2</sup>. Two of these lineages, Lineage 5 (L5) and Lineage 6 (L6), together originally known  
52 as *Mycobacterium africanum* (*Maf*), are restricted to West Africa for unknown reasons. By contrast,  
53 MTBC lineages belonging to *Mycobacterium tuberculosis* sensu stricto (*Mtbss*), in particular  
54 Lineage 4 (L4), are more geographically widespread<sup>1</sup>. *M. africanum* has remained an important  
55 pathogen in West Africa since its first description in 1968<sup>3</sup>, and is responsible for up to half of  
56 human tuberculosis (TB) in some regions<sup>4</sup>.

57 The MTBC is thought to have originally emerged in Africa and subsequently spread to other parts  
58 of the world following waves of human migrations, trade and conquests<sup>5-8</sup>. Yet the reason(s) why  
59 *Maf* is limited to West Africa despite, for example, centuries of the trans-Atlantic slave trade  
60 remains unknown. Some comparative studies have identified phenotypic differences between the  
61 two *Maf* lineages<sup>9,10</sup>, suggesting they might be fundamentally distinct and occupy different  
62 ecological niches.

63 Three hypotheses have been put forward to explain the restriction of *Maf* to West Africa. The first  
64 hypothesis proposes that *Maf* might have emigrated outside of Africa but was later outcompeted by  
65 *Mtbss*, which has been shown to be more virulent than *Maf* in animal models<sup>11</sup>. The second  
66 hypothesis states that the restriction of *Maf* to West Africa is due to its adaptation to West African  
67 human populations<sup>9,12</sup>. Finally, according to the third hypothesis, *Maf* might be zoonotic with an  
68 animal reservoir restricted to West Africa.

69 Some evidence in support of the first hypothesis is the reported association of *Maf* (L6) with HIV  
70 co-infection, attenuated ESAT-6 responses and delayed progression to active disease relative to  
71 *Mtbss*<sup>9,13-16</sup>. In addition, both *Maf* lineages as well as *Mtbss* L1, together described as “ancestral”  
72 MTBC lineages, have been shown to elicit a stronger early production of pro-inflammatory  
73 cytokines compared to the “modern” MTBCC L2, L3 and L4<sup>17</sup>. The delayed pro-inflammatory

74 immune response in the “modern” MTBC lineages might allow for more rapid disease progression  
75 and transmission<sup>17</sup>. The second hypothesis is supported by the statistical association of L5 with the  
76 native West African ethnic group known as “Ewe” reported by two independent studies in  
77 Ghana<sup>9,12</sup>. The third hypothesis is mainly supported by the phylogenetic placement of *Maf* (L6)  
78 amidst the cluster of the animal-adapted members of the MTBC in the various phylogenies of the  
79 MTBC<sup>5,7,18</sup>.

80 If the first hypothesis is true, the proportion of *Maf* associated TB in West Africa is expected to  
81 decline over time. However, there are conflicting reports of the proportion of *Maf* associated TB in  
82 West Africa. Even though the report of a steady decline of *Maf* associated TB in some settings  
83 seems to support the first hypothesis<sup>19–21</sup>, other studies indicate that *Maf* remains an important cause  
84 of TB in West-Africa<sup>22–24</sup>. In Ghana for instance, a recent study showed that the proportion of TB  
85 due to *Maf* remained constant over the 8 year study period<sup>25</sup>. Even though, the reported statistical  
86 association of L5 with ethnicity in Ghana suggests a possible co-evolutionary scenario in favour of  
87 the second hypothesis, genetic evidence of co-evolution/co-adaptation remains to be demonstrated.  
88 In the case of the third hypothesis, the environmental or zoonotic reservoir(s) need to be identified.

89 In this study, we used whole genome sequencing of Ghanaian *Maf* clinical strains to explore  
90 genomic differences between the two *Maf* lineages that might support one or more of these  
91 hypotheses.

92

93

## 94 **Results**

### 95 **Whole genome SNP distance, average nucleotide diversity and phylogeny of *Maf* in Ghana**

96 Our data set comprised *Maf* isolates obtained from TB patients reporting to various hospitals in  
97 Ghana. After excluding genomes that did not meet the criteria for mapping (Supplementary figure  
98 S1), 253 *Maf* genomes (175 L5 and 78 L6) were used for the analysis. Patients' residential regions  
99 are provided (Supplementary figure S2). The upper right pie chart indicates those 97 patients (55  
100 infected with L5 and 42 with L6) with no information on region of residence. We found the number  
101 of fixed SNPs (SNPs found in more than 95% of genomes) in a genome compared to the MTBC  
102 ancestor<sup>26</sup> to be significantly higher in L6 (1,037) compared to L5 (928) (Wilcoxon rank-sum test,  $p$   
103  $< 0.0001$ ) (Fig 1A). Moreover, despite the larger number of L5 genomes (more than twice the  
104 number of L6 genomes) analyzed, the mean pairwise SNP distance between any two strains was  
105 significantly higher in L6 (360) compared to L5 (223) (Wilcoxon rank-sum test,  $p < 0.0001$ ; Fig  
106 1B). Finally, the whole genome average nucleotide diversity ( $\pi$ ) for L6 (0.000110) was significantly  
107 higher compared to L5 (0.00007) (Fig 1C, non-overlapping 95% confidence interval (CI)). Taken  
108 together, these findings show that L6 in Ghana is significantly more genetically diverse than L5  
109 irrespective of sample size. The whole genome-based phylogenetic tree of the Ghanaian *Maf* strains  
110 generated from 11,027 total polymorphic positions between the *Maf* strains and the MTBC ancestor  
111 reference excluding repetitive and mobile genetic element rooted on *M. canettii* is shown in Figure  
112 2. The *Maf* lineages were resolved as two distinct branches of the genome-based tree with possible  
113 sub-groups (Fig 2).

114

### 115 **Genetic diversity of L6 is significantly higher than L5 among T cell epitopes and genes of** 116 **other functional categories.**

117 We found that the higher diversity of L6 compared to L5 was reflected across all the 8 functional  
118 categories of genes analyzed (Fig. 3). Whereas pairwise nucleotide diversity ( $\pi$ ) for L5 was below  
119 0.0001 across all functional categories, the estimates for L6 were all above 0.0001. The most  
120 prominent difference between L6 and L5 was within 1,226 experimentally confirmed human T cell

121 epitopes of MTBC which we downloaded from the Immune Epitope Database (IEDB)<sup>27</sup>, for which  
122 the mean  $\pi$  for L5 was 0.000063 compared to the 0.000149 estimated for L6, reflecting more than a  
123 two-fold difference in diversity (non-overlapping 95% CI).

124 Within L5, there was no difference between the estimated  $\pi$  for the T cell epitopes and any of the  
125 other functionally categorized genes. However, within L6, genes encoding regulatory proteins and  
126 those involved with virulence, detoxification and adaptation were more diverse compared to those  
127 for lipid metabolism as well as intermediate metabolism and respiration (non-overlapping 95% CI).  
128 In addition, genes encoding regulatory proteins were more diverse compared to those involved with  
129 lipid metabolism (non-overlapping 95% CI).

130

### 131 **Different selection pressures within L5 and L6 in human T cell epitopes and regulatory** 132 **proteins**

133 The average pairwise dN/dS of the concatenates of T cell epitopes as well as genes of the seven  
134 other functional categories were calculated for all genomes and compared between L5 and L6.  
135 Apart from sequences encoding human T cell epitopes and regulatory proteins that had median  
136 average pairwise dN/dS ratios greater than 1.0 in L5 and L6, respectively (Fig 4, panel a and b), all  
137 the remaining functional categories showed a dN/dS ratio of less than 1.0 in both lineages  
138 (Supplementary figure S3). Human T cell epitopes of *Maf* L5 (median pairwise dN/dS = 0.64) were  
139 significantly more conserved compared to L6, which exhibited higher diversity (median pairwise  
140 dN/dS = 1.53) (Wilcoxon rank-sum test,  $W = 2265$ ,  $p < 0.0001$ ). Conversely, genes encoding  
141 regulatory proteins were more diverse among L5 genomes (with median pairwise dN/dS = 1.03)  
142 (Wilcoxon rank-sum test,  $W = 6303$ ,  $p = 0.0010$ ) compared to L6 (with median pairwise dN/dS =  
143 0.85). To account for the different sample sizes; 147 L5 compared to 67 L6 genomes after  
144 excluding 43 genomes differing from others with less than 10 SNPs difference (see Methods and  
145 supplementary figure S1), we repeated the analysis using mean values of 10 randomly sampled sets  
146 of L5 genomes with sample size 67 among human T cell epitopes (Fig 4, panel c) and regulatory  
147 proteins (Fig 4 panel d) and got similar results (Wilcoxon rank-sum test,  $W = 1300$ ,  $p < 0.0001$ ,  $W$

148 = 3466,  $p < 0.0001$  for T cell epitopes and regulatory proteins, respectively).

149

### 150 **Lineage-specific accumulation of mutations within human T cell epitopes.**

151 When we compared the number of epitopes with amino acid mutations between lineages, we found  
152 more epitopes mutated in L6 (57) compared to L5 (45), but no statistically significant difference  
153 (Fig 5). In addition, we compared the number of nonsynonymous polymorphic sites between the  
154 two *Maf* lineages within the human T cell epitopes (Supplementary Fig S4), and found that these  
155 were more frequent in L6 (38) compared to L5 (28) but with no statistically significant difference  
156 between L5 and L6. We compared the identity of the mutant human T cell epitopes between the two  
157 *Maf* lineages (Fig 6A) and found 72 epitopes that were uniquely mutated in L5 (among 174  
158 genomes) compared to 54 epitopes in L6 (among 67 genomes). Only two epitopes (IEDB IDs  
159 178644 and 178609) were mutated in both lineages. However, the mutations were at different loci  
160 with different amino acid substitutions (A183G and G278D in L5 compared to A177V and D277N  
161 in L6). In terms of T cell antigens, there were 28 uniquely mutated in L5 compared to 19 in L6 and  
162 12 mutated in both lineages involving different epitopes within the respective antigens (Fig 6B).  
163 The 12 T cell antigens mutated in both lineages are summarized in Table 1. All T cell epitopes and  
164 antigens with mutations among the two *Maf* lineages are listed in Supplementary table S5.

165

### 166 **Conservation of human T cell epitopes of L5 is not affected by patient ethnicity.**

167 We previously reported an association between L5 and Ewe patient ethnicity<sup>9,12</sup>. Hence to test if  
168 conservation of T cell epitopes and/or the diversity of regulatory proteins in L5 was influenced by  
169 patient ethnicity, we estimated pairwise dN/dS for sequences encoding T cell epitopes and  
170 regulatory proteins of L5 genomes stratified by patient ethnicity (Fig 7). The median dN/dS of T  
171 cell epitopes were all below 1.0 irrespective of patient ethnicity (Fig 7A). However, the median  
172 dN/dS of regulatory proteins were marginally above 1.0 among L5 from Ewe TB patients and  
173 below 1.0 among L5 from non-Ewe TB patients (Fig 7B). There was no statistically significant



174 difference between the estimated dN/dS of either the sequences encoding T cell epitopes (Fig 7A)  
175 or regulatory proteins (Fig 7B) between L5 from TB patients of Ewe and non-Ewe ethnicities. In  
176 addition, there was no difference in either the number of T cell epitopes with amino acid  
177 substitutions (Supplementary figure S6A) or the number of non-redundant SNPs (Supplementary  
178 figure S6B) between L5 strains from patients of the Ewe ethnicity and those of other ethnicities.

179

180

## 181 **Discussion**

182 In this study, we compared the largest collection of *Maf* genomes including both L5 and L6  
183 reported so far. We found that, 1) at the whole genome level, L6 had significantly more pairwise  
184 nucleotide diversity, higher number of fixed SNPs as well as lower average pairwise SNPs relative  
185 to L5, 2) L5 had overall more conserved human T cell epitopes compared to L6, 3) conservation of  
186 T cell epitopes in L5 was not influenced by patient ethnicity, and 4) genes encoding regulatory  
187 proteins of L5 had lower pairwise nucleotide diversity but a higher ratio of non-synonymous to  
188 synonymous substitution rate than L6.

189

190 Our finding that *Maf* L6 has a higher number of fixed SNPs and higher average pairwise SNPs  
191 relative to L5 suggests that L6 has diversified more compared to L5 since the emergence of the two  
192 lineages<sup>5,28,29</sup>. This observation is corroborated by the higher genome-wide nucleotide diversity of  
193 L6 compared to L5. The higher diversity of L6 might be linked to an earlier emergence. However,  
194 recent whole genome-based phylogenies rooted on *Mycobacterium canettii* show that following the  
195 branch leading to *Maf* and all animal-adapted members of the MTBC defined by the characteristic  
196 deletion in RD9<sup>30,31</sup>, L5 branches off much earlier than L6<sup>32</sup>. Hence, L5 is ancestral to L6, a notion  
197 which is also supported by genomic deletion analyses which show that in addition to RD9, L6 and  
198 all the animal-adapted members of the MTBC harbor the deletions of RD7, RD8 and RD10<sup>30</sup>.  
199 Hence other factors are likely to account for the higher diversity of L6 compared to L5 in Ghana.

200

201 *Maf* is highly restricted to West Africa, and thus could be seen as an ecological specialist compared  
202 to the other MTBC lineages. Specialists are expected to harbour less diversity across strains  
203 compared to generalists<sup>8</sup>. The observed lower genome-wide nucleotide diversity of L5 hence  
204 supports the hypothesis that L5 might be a specialist maintained in West Africa by adaptation to  
205 specific human genotypes. In contrast, the higher genome-wide diversity of L6 indicates a  
206 generalist pathogen, and hence would have been expected to be globally distributed instead of

207 displaying restriction to West Africa<sup>4,8</sup>. The observed diversity of L6 therefore may indicate a  
208 pathogen with a wider host range, supporting the hypothesis of maintenance in West Africa by  
209 possible environmental or zoonotic reservoir(s). Alternatively, the higher diversity of L6 coupled  
210 with the higher number of fixed SNPs could mean that it has a higher intrinsic mutation rate  
211 compared to L5.

212

213 Even though 90% of T cell epitopes were highly conserved in both L5 and L6 (Fig 5), which is in  
214 line with previous reports for the whole MTBC<sup>26,8,33</sup>, we found T cell epitopes in L5 to exhibit less  
215 nucleotide diversity and to be under purifying selection compared to L6. The purifying selection of  
216 mutations within L5 is comparable to that reported for the specialist sub-lineages of L4<sup>8</sup>.  
217 Interestingly, dN/dS within essential genes for survival in macrophages did not differ between L5  
218 and L6 (Supplementary Figure S3) supporting the notion that the genes in this category perform key  
219 functions in both L5 and L6. Since T cell response might partially drive the pathogenesis of TB<sup>34</sup>,  
220 the relative conservation of T cell epitopes in L5 indicate that it might elicit a more efficient T cell  
221 response compared to L6 in its particular host population. This therefore suggests L5 may be a more  
222 human-specific pathogen and L6, with significantly more diverse T cell epitopes, a potential  
223 opportunistic environmental or zoonotic pathogen. Even though the conserved T cell epitopes of L5  
224 could account for geographical restriction to West Africa and the association with the Ewe  
225 ethnicity<sup>1,4,9,12</sup>, we found no difference between the diversity of L5 isolated from TB patients of  
226 Ewe and those of non-Ewe ethnic backgrounds. The limited number of L5 genomes from Ewe TB  
227 patients could possibly account for the lack of observed difference in diversity of T cell epitopes of  
228 L5 from TB patients of Ewe and non-Ewe ethnicities, and hence larger sample sizes are required to  
229 explore this further. L5 isolated from TB patients of the Ewe ethnicity were shown to be distributed  
230 all across the L5 clade of the *Maf* phylogeny instead of clustering in a particular sub-clade  
231 (Supplementary figure S7). This suggests that, if L5 is indeed maintained in West Africa by its co-  
232 evolution/adaptation with the Ewe ethnic group of West Africa (Cote d'Ivoire, Ghana, Nigeria,

233 Togo and Benin)<sup>9,12</sup>, there is no specific sub-group of L5 that is responsible for this association but  
234 rather the whole of L5.

235

236 Members of the MTBC survive in the host mostly by modulation of the host immune response via  
237 the action of secretory proteins which form part of regulons controlled by specific regulatory  
238 proteins<sup>35,36</sup>. In addition, some regulatory proteins are involved in the regulation of transcription and  
239 translation of these secretory effectors as well as gene expression of other proteins involved with  
240 diverse functions<sup>36,37</sup>. Regulatory proteins in the MTBC hence play an important role in the survival  
241 and propagation of the bacteria. Therefore, our finding that regulatory proteins in L5 are under  
242 neutral selection (pairwise dN/dS = 1.03) compared to L6 in which they appear under purifying  
243 selection indicates that the mutations within regulatory proteins might be lineage-specific. This  
244 result is comparable to an earlier report comparing mutations within regulatory proteins between  
245 *Mtbss* and *M. bovis*, which found most of the *M. bovis* to harbor majority of the mutations<sup>36</sup>. As  
246 mutations within some regulatory proteins have been associated with attenuated virulence<sup>38-40</sup>, our  
247 observation could account for the reported attenuated virulence of *Maf* relative to *Mtbss*<sup>14,15,17,41</sup>.  
248 This calls for further comparative studies of regulatory proteins between L5, L6 and other MTBC  
249 lineages to ascertain the role of regulatory proteins.

250

251 Our data is limited by the fact that, the number of L5 genomes was almost 3 times the number of L6  
252 genomes; however, we used 1,000x bootstrap sampling with replacement of both L5 and L6 of  
253 equal sample size to limit any possible bias when comparing both lineages due to differences in  
254 sample size. In addition, a number of the L5 genomes did not have data on ethnicity and hence  
255 affected the number of L5 isolated from patients of the Ewe ethnicity for which we used average  
256 estimates of 10 random samples of L5 isolated from patients of non-Ewe origin in comparisons to  
257 account for the different sample sizes.

258

259 In conclusion, our findings indicate that the two *Maf* lineages L5 and L6 are distinct in terms of  
260 genomic diversity, and selection pressure on T cell epitopes and regulatory proteins, possibly  
261 reflecting different ecological niches. Whereas L5 may be maintained in West Africa by its co-  
262 evolution or adaptation with native West Africans, L6 may be maintained by an environmental  
263 reservoir, possibly a zoonotic source. This genomic analysis of *Maf* from Ghana gives a glimpse of  
264 the often neglected diversity within *Maf* and the MTBC overall. More studies are needed from  
265 representative genomes of *Maf* from across West Africa to understand the full diversity of these  
266 members of the MTBC. Improved knowledge of *Maf* will have implications for our understanding  
267 of human TB and the development of better control tools.

268

269

270 **Tables**

271 **Table 1: Functions of the 12 T cell antigens mutated in both L5 and L6**

| T cell antigen | Function                                                                                                      |
|----------------|---------------------------------------------------------------------------------------------------------------|
| Rv0288         | encodes low molecular weight antigen 7 <b>EsxH</b> involved with cell wall and cell processes                 |
| Rv0934         | encodes periplasmic phosphate-binding lipoprotein <b>PstS1</b> involved with cell wall and cell processes     |
| Rv2029c        | encodes 6-phosphofructokinase <b>PfkB</b> involved with intermediate metabolism and respiration               |
| Rv2627c        | encoding a conserved hypothetical protein                                                                     |
| Rv3003c        | Encodes the large subunit of acetolactate synthase involved with valine and isoleucine biosynthesis           |
| Rv3024c        | encodes a probable tRNA involved with information pathways                                                    |
| Rv3763         | encodes a 19 kDa lipoprotein antigen precursor <b>LpqH</b> involved with cell wall and cell processes         |
| Rv3804c        | encodes the secreted antigen 85-a <b>FbpA</b> involved with lipid metabolism                                  |
| Rv3823c        | encodes conserved integral membrane transport protein <b>MmpL8</b> involved with cell wall and cell processes |
| Rv3825c        | encodes polyketide synthase <b>Pks2</b> involved with lipid metabolism                                        |
| Rv3879c        | encodes ESX-1 secretion-associated protein <b>EspK</b> involved with cell wall and cell processes             |
| Rv3883c        | encodes membrane-anchored myosin <b>MycP1</b> involved with intermediate metabolism and respiration           |

272

273

## 274 **Figure legends**

275 Figure 1: Number of SNPs per *Maf* Lineage (175 L5 and 78 L6 genomes). *a*: Number of SNPs  
276 between *Maf* genomes and the hypothetical MTBC ancestor (the median fixed SNPs of L5 (934) is  
277 lower ( $W = 417$ ,  $p\text{-value} < 2.2e-16$ ) compared to L6 (1,039). *b*: Pairwise SNPs between genomes  
278 within each lineage (the median of the pairwise SNPs is lower ( $W = 234$ ,  $p\text{-value} < 2.2e-16$ ) in L5  
279 (212) compared to L6 (334). *c*: Whole genome average nucleotide diversity ( $\pi$ ) between L5 and L6  
280 (the mean diversity of L5 (0.000076) is significantly (non-overlapping 95% confidence intervals)  
281 lower than L6 (0.000110). Error bars indicate 95% confidence intervals.

282

283 Figure 2: Phylogeny of Ghanaian *Maf* strains. (The maximum likelihood phylogenetic tree of 253  
284 Ghanaian *Maf* isolates is based on 11,027 variable positions. The tree was rooted on *M. canettii* and  
285 the confidence of nodes was assessed by bootstrapping 1000 pseudo replicates. Each lineage clade  
286 is colored according to the conventional MTBC lineage color codes<sup>1</sup>.

287

288 Figure 3: Averaged nucleotide diversity ( $\pi$ ) of *Maf* within genes of eight functional categories. *epit*  
289 – genes encoding human T cell epitopes, *esmac* – genes essential for growth in macrophages,  
290 *intmedres* – genes involved with intermediate metabolism and respiration, *lipmet* – genes involved  
291 with lipid metabolism, *virdetad* – genes involved with virulence, detoxification and adaptation,  
292 *cwallproc* – genes involved with cell wall and cell processes, *regprot* – genes encoding regulatory  
293 proteins and *infopath* – genes involved with information pathways. Error bars are indications of  
294 95% confidence intervals.

295

296 Figure 4: Pairwise dN/dS of genes encoding human T cell epitopes and regulatory proteins in L5  
297 and L6. Estimation of pairwise dN/dS of epitopes (*a*) and regulatory proteins (*b*) using the entire  
298 147 L5 against the 67 L6 genomes. Estimation of pairwise dN/dS of epitopes (*c*) and regulatory

299 proteins (*d*) using the mean dN/dS values of 10 random samples (size =67, with replacement) of L5  
300 against the 67 L6 genomes.

301

302 Figure 5: Number of human T cell epitopes with nonsynonymous SNPs (nsSNPs) stratified by *Maf*  
303 lineage. No significant difference (X-squared = 1.487, df = 1, p-value = 0.22) between the number  
304 of epitopes with nsSNPs among the 67 L6 genomes and L5 (mean values of 10 random samples of  
305 size=67 with replacement).

306

307 Figure 6: Number of human T cell epitopes (*a*) and human T cell antigens (*b*) with amino acid  
308 substitutions stratified by *Maf* lineage. Green represents L6-specific mutant antigens or epitopes.  
309 Brown represents L5-specific mutant antigens or epitopes. Yellow represents antigens or epitopes  
310 mutated in both L5 and L6 but at different loci with different amino acid substitutions.

311

312 Figure 7: Pairwise dN/dS of sequences encoding human T cell epitopes (*a*) and genes encoding  
313 regulatory proteins (*b*) of L5 by patient ethnicity. L5 genomes from strains isolated from patients of  
314 the Ewe ethnicity (15 genomes) against, average values of 10 random samples of size 15 of L5  
315 genomes of isolates from Non-Ewe patients.

316

317



## 318 **References**

- 319 1. Gagneux, S. *et al.* Variable host-pathogen compatibility in *Mycobacterium tuberculosis*.  
320 *Proc. Natl. Acad. Sci. U. S. A.* **103**, 2869–2873 (2006).
- 321 2. Gagneux, S. & Small, P.M. Global phylogeography of *Mycobacterium tuberculosis* and  
322 implications for tuberculosis product development. *Lancet Infect. Dis.* **7**, 328–37 (2007).
- 323 3. Castets, M., Boisvert, H., Grumbach, F., Brunel, M. & Rist, N. Tuberculosis bacilli of the  
324 African type: preliminary note. *Rev. Tuberc. Pneumol. (Paris)*. **32**, 179–84 (1968).
- 325 4. de Jong, B. C., Antonio, M. & Gagneux, S. *Mycobacterium africanum*-review of an  
326 important cause of human tuberculosis in West Africa. *PLoS Negl. Trop. Dis.* **4**, e744 (2010).
- 327 5. Comas, I. *et al.* Out-of-Africa migration and Neolithic coexpansion of *Mycobacterium*  
328 tuberculosis with modern humans. *Nat. Genet.* **45**, 1176–82 (2013).
- 329 6. Comas, I. *et al.* Population Genomics of *Mycobacterium tuberculosis* in Ethiopia Contradicts  
330 the Virgin Soil Hypothesis for Human Tuberculosis in Sub-Saharan Africa. *Curr. Biol.*  
331 3260–3266 (2015). doi:10.1016/j.cub.2015.10.061
- 332 7. Hershberg, R. *et al.* High functional diversity in *Mycobacterium tuberculosis* driven by  
333 genetic drift and human demography. *PLoS Biol.* **6**, e311 (2008).
- 334 8. Stucki, D. *et al.* *Mycobacterium tuberculosis* lineage 4 comprises globally distributed and  
335 geographically restricted sublineages. *Nat. Genet.* **48**, 1535–1543 (2016).
- 336 9. Asante-Poku, A. *et al.* Molecular epidemiology of *Mycobacterium africanum* in Ghana. *BMC*  
337 *Infect. Dis.* **16**, 385 (2016).
- 338 10. Yeboah-manu, D. *et al.* Genotypic diversity and drug susceptibility patterns among *M.*  
339 tuberculosis complex isolates from South-Western Ghana. *PLoS One* **6**, e21906 (2011).
- 340 11. Bold, T. D. *et al.* Impaired fitness of *Mycobacterium africanum* despite secretion of ESAT-6.  
341 *J. Infect. Dis.* **205**, 984–90 (2012).
- 342 12. Asante-Poku, A. *et al.* *Mycobacterium africanum* Is Associated with Patient Ethnicity in  
343 Ghana. *PLoS Negl. Trop. Dis.* **9**, e3370 (2015).

- 344 13. de Jong, B. C. *et al.* Progression to active tuberculosis, but not transmission, varies by  
345 *Mycobacterium tuberculosis* lineage in The Gambia. *J. Infect. Dis.* **198**, 1037–43 (2008).
- 346 14. Homolka, S., Niemann, S., Russell, D. G. & Rohde, K. H. Functional genetic diversity  
347 among *Mycobacterium tuberculosis* complex clinical isolates: delineation of conserved core  
348 and lineage-specific transcriptomes during intracellular survival. *PLoS Pathog.* **6**, e1000988  
349 (2010).
- 350 15. Tientcheu, L. D. *et al.* Differences in T-cell responses between *Mycobacterium tuberculosis*  
351 and *Mycobacterium africanum* -infected patients. *Eur. J. Immunol.* **44**, 1387–1398 (2014).
- 352 16. Jong, B. C. De *et al.* *Mycobacterium africanum* elicits an attenuated T cell response to early  
353 secreted antigenic target, 6 kDa, in patients with tuberculosis and their household contacts. *J.*  
354 *Infect. Dis.* **193**, 1279–86 (2006).
- 355 17. Portevin, D. *et al.* Human macrophage responses to clinical isolates from the *Mycobacterium*  
356 *tuberculosis* complex discriminate between ancient and modern lineages. *PLoS Pathog.* **7**,  
357 e1001307 (2011).
- 358 18. Niemann, S., Merker, M., Kohl, T. & Supply, P. Impact of Genetic Diversity on the Biology  
359 of *Mycobacterium tuberculosis* Complex Strains. *Microbiol. Spectr.* **4**, (2016).
- 360 19. Källenius, G. *et al.* Evolution and clonal traits of *Mycobacterium tuberculosis* complex in  
361 Guinea-Bissau. *J. Clin. Microbiol.* **37**, 3872–3878 (1999).
- 362 20. Niobe-Eyangoh, S. N. *et al.* Genetic biodiversity of *Mycobacterium tuberculosis* complex  
363 strains from patients with pulmonary tuberculosis in Cameroon. *J. Clin. Microbiol.* **41**, 2547–  
364 53 (2003).
- 365 21. Dosso, M. *et al.* Primary resistance to antituberculosis drugs: a national survey conducted in  
366 Côte d’Ivoire in 1995–1996\* for the Ivoirian Study Group on Tuberculosis Resistance \*\*  
367 Projet Santé Abidjan (Coopération S U M M A R Y. *INT J TUBERC LUNG DIS* **3**, 805–809  
368 (1999).
- 369 22. Koro, F. K. *et al.* Population dynamics of tuberculous bacilli in cameroon as assessed by

- 370 spoligotyping. *J. Clin. Microbiol.* **51**, 299–302 (2013).
- 371 23. Gehre, F. *et al.* The first phylogeographic population structure and analysis of transmission  
372 dynamics of *M. africanum* West African 1--combining molecular data from Benin, Nigeria  
373 and Sierra Leone. *PLoS One* **8**, e77000 (2013).
- 374 24. Lawson, L. *et al.* A molecular epidemiological and genetic diversity study of tuberculosis in  
375 Ibadan, Newi and Abuja, Nigeria. *PLoS One* **7**, e38409 (2012).
- 376 25. Yeboah-Manu, D. *et al.* Spatio-Temporal Distribution of *Mycobacterium tuberculosis*  
377 Complex Strains in Ghana. *PLoS One* **11**, e0161892 (2016).
- 378 26. Comas, I. *et al.* Human T cell epitopes of *Mycobacterium tuberculosis* are evolutionarily  
379 hyperconserved. *Nat. Genet.* **42**, 498–503 (2010).
- 380 27. Vita, R. *et al.* The immune epitope database (IEDB) 3.0. *Nucleic Acids Res.* **43**, (2015).
- 381 28. Bos, K. I. *et al.* Pre-Columbian mycobacterial genomes reveal seals as a source of New  
382 World human tuberculosis. *Nature* **514**, 494–497 (2014).
- 383 29. Kay, G. L. *et al.* Eighteenth-century genomes show that mixed infections were common at  
384 time of peak tuberculosis in Europe. *Nat. Commun.* **6**, 6717 (2015).
- 385 30. Brosch, R. *et al.* A new evolutionary scenario for the *Mycobacterium*. *Proc. Natl. Acad. Sci.*  
386 **99**, 3684–3689 (2002).
- 387 31. Mostowy, S., Cousins, D., Brinkman, J., Aranaz, A. & Behr, M. a. Genomic deletions  
388 suggest a phylogeny for the *Mycobacterium tuberculosis* complex. *J. Infect. Dis.* **186**, 74–80  
389 (2002).
- 390 32. Coscolla, M. & Gagneux, S. Consequences of genomic diversity in mycobacterium  
391 tuberculosis. *Semin. Immunol.* **26**, 431–444 (2014).
- 392 33. Coscolla, M. *et al.* *M. tuberculosis* T Cell Epitope Analysis Reveals Paucity of Antigenic  
393 Variation and Identifies Rare Variable TB Antigens Reveals Paucity of Antigenic Variation  
394 and Identifies Rare Variable TB Antigens. *Cell Host Microbe* **18**, 538–548 (2015).
- 395 34. Pai, M. *et al.* Tuberculosis. *Nat. Rev. Dis. Prim.* **2**, 16076 (2016).

- 396 35. Brodin, P., Rosenkrands, I., Andersen, P., Cole, S. T. & Brosch, R. ESAT-6 proteins:  
397 Protective antigens and virulence factors? *Trends Microbiol.* **12**, 500–508 (2004).
- 398 36. Bigi, M. M. *et al.* Polymorphisms of 20 regulatory proteins between *Mycobacterium*  
399 *tuberculosis* and *Mycobacterium bovis*. *Microbiol. Immunol.* (2016). doi:10.1111/1348-  
400 0421.12402
- 401 37. Raman, S., Hazra, R., Dascher, C. C. & Husson, R. N. Transcription regulation by the  
402 *Mycobacterium tuberculosis* alternative sigma factor SigD and its role in virulence. *J.*  
403 *Bacteriol.* (2004). doi:10.1128/JB.186.19.6605-6616.2004
- 404 38. Gonzalo-asensio, J., Malaga, W., Pawlik, A. & Astarie-dequeker, C. Evolutionary history of  
405 *tuberculosis* shaped by conserved mutations in the PhoPR virulence regulator. **111**, (2014).
- 406 39. Peirs, P., Parmentier, B., De Wit, L. & Content, J. The *Mycobacterium bovis* homologous  
407 protein of the *Mycobacterium tuberculosis* serine/threonine protein kinase MbK (PknD) is  
408 truncated. *FEMS Microbiol. Lett.* **188**, 135–9 (2000).
- 409 40. Saïd-Salim, B., Mostowy, S., Kristof, A. S. & Behr, M. A. Mutations in *Mycobacterium*  
410 *tuberculosis* Rv0444c, the gene encoding anti-SigK, explain high level expression of MPB70  
411 and MPB83 in *Mycobacterium bovis*. *Mol. Microbiol.* **62**, 1251–1263 (2006).
- 412 41. de Jong, B. C. *et al.* Differences between *tuberculosis* cases infected with *Mycobacterium*  
413 *africanum*, West African type 2, relative to Euro-American *Mycobacterium tuberculosis*: an  
414 update. *FEMS Immunol. Med. Microbiol.* **58**, 102–5 (2010).
- 415 42. Otchere, I. D. *et al.* Detection and characterization of drug-resistant conferring genes in  
416 *Mycobacterium tuberculosis* complex strains: A prospective study in two distant regions of  
417 *Tuberculosis* **99**, 147–154 (2016).
- 418 43. Warren, R. M. *et al.* Molecular evolution of *Mycobacterium tuberculosis*: phylogenetic  
419 reconstruction of clonal expansion. *Tuberculosis* **81**, 291–302 (2001).
- 420 44. Kamerbeek, J. *et al.* Simultaneous detection and strain differentiation of *Mycobacterium*  
421 *tuberculosis* for diagnosis and epidemiology. *J. Clin. Microbiol.* **35**, 907–14 (1997).

- 422 45. Bolger, A. M., Lohse, M. & Usadel, B. Trimmomatic: A flexible trimmer for Illumina  
423 sequence data. *Bioinformatics* **30**, 2114–2120 (2014).
- 424 46. Li, H. & Durbin, R. Fast and accurate short read alignment with Burrows-Wheeler transform.  
425 *Bioinformatics* **25**, 1754–1760 (2009).
- 426 47. Koboldt, D. C. *et al.* VarScan 2 : Somatic mutation and copy number alteration discovery in  
427 cancer by exome sequencing VarScan 2 : Somatic mutation and copy number alteration  
428 discovery in cancer by exome sequencing. *Genome Res.* **22**, 568–576 (2012).
- 429 48. Cingolani, P. *et al.* A program for annotating and predicting the effects of single nucleotide  
430 polymorphisms, SnpEff: SNPs in the genome of *Drosophila melanogaster* strain w1118; iso-  
431 2; iso-3. *Fly (Austin)*. **6**, 80–92 (2012).
- 432 49. Stamatakis, A. RAxML version 8: A tool for phylogenetic analysis and post-analysis of large  
433 phylogenies. *Bioinformatics* **30**, 1312–1313 (2014).
- 434 50. Lew, J. M., Kapopoulou, A., Jones, L. M. & Cole, S. T. TubercuList - 10 years after.  
435 *Tuberculosis* **91**, 1–7 (2011).
- 436 51. Popescu, A.-A., Huber, K. T. & Paradis, E. ape 3.0: New tools for distance-based  
437 phylogenetics and evolutionary analysis in R. *Bioinformatics* **28**, 1536–1537 (2012).
- 438 52. R Core Team. R: A language and environment for statistical computing version 3.2.3. *R*  
439 *Foundation for Statistical Computing, Vienna, Austria* (2015). Available at:  
440 [https://www.coursehero.com/file/pe12cv/Code-R-version-323-2015-12-10-Wooden-](https://www.coursehero.com/file/pe12cv/Code-R-version-323-2015-12-10-Wooden-Christmas-Tree-Copyright-C-2015-The-R/)  
441 [Christmas-Tree-Copyright-C-2015-The-R/](https://www.coursehero.com/file/pe12cv/Code-R-version-323-2015-12-10-Wooden-Christmas-Tree-Copyright-C-2015-The-R/). (Accessed: 26th July 2017)
- 442 53. Gardner, M. J. & Altman, D. G. Statistics in Medicine Confidence intervals rather than P  
443 values: estimation rather than hypothesis testing. *Br. Med. J. (Clin. Res. Ed)*. **292**, 746–750  
444 (1986).
- 445 54. Nakagawa, S. & Cuthill, I. C. Effect size, confidence interval and statistical significance: A  
446 practical guide for biologists. *Biol. Rev.* **82**, 591–605 (2007).
- 447 55. Charif D, L. J. *SeqinR 1.0-2: a contributed package to the R-project for statistical computing*

- 448 *devoted to biological sequences retrieval and analysis. In: Bastolla U, Porto MERH,*  
449 *Vendruscolo M, editors. Structural approaches to sequence evolution: Molecules, networks,*  
450 *populations. Springer Verlag (2007).*
- 451 56. Tamura, K., Stecher, G., Peterson, D., Filipski, A. & Kumar, S. MEGA6: Molecular  
452 Evolutionary Genetics Analysis version 6.0. *Mol. Biol. Evol.* **30**, 2725–9 (2013).  
453

454 **Acknowledgements**

455 Bacterial Isolation and DNA preparations were done in the Biosafety level 3 facility at the Noguchi  
456 Memorial Institute for Medical Research, University of Ghana. Bioinformatics analyses were  
457 performed using the scientific computing core (sciCORE) at the University of Basel and the  
458 computing facility of the Wellcome Trust Sanger Institute, Genome Campus, Cambridge  
459 University. This work was supported by the Wellcome Trust Intermediate Fellowship awarded to  
460 DYM (Grant Number 097134/Z/11/Z) and by the Swiss National Science Foundation (grants  
461 310030\_166687, IZRJZ3\_164171 and IZLSZ3\_170834), the European Research Council (309540-  
462 EVODRTB) and SystemsX.ch.

463

464

465 **Author contributions**

466 Conceived the idea: DYM, SG

467 Designed experiments: DYM, SG, IDO, MC, SRH, JP

468 Contributed reagents and performed experiments: IDO, MC, AAP, LSB, MC, SOW, AF, CL, GAA,

469 AIY, AB, SYA, PA, CL, DB, SB, FG, PB, TK, SN, MA, SN, CB, BCDJ, JP and SRH

470 Analysed Data: IDO, MDC, SRH, LSB, SG, DYM

471 Wrote manuscript: IDO, MC, SG and DYM

472 All authors critically reviewed the manuscript

473

474 **Competing financial interests**

475 None declared.

476

477 **Data availability.**

478 All the analyzed and/or generated data in this study are included in this article and its

479 supplementary information files. Whole genome sequence reads have been submitted to the EMBL-  
480 EBI European Nucleotide Archive (ENA) Sequence Read Archive (SRA) with accession numbers  
481 provided in the supplementary document attached (Supplementary data S8).

## 482 **Supplementary Information**

483

484 Supplementary figure S1: Flow chart of Ghanaian *Maf* genomes used for the study. Sites of DNA  
485 sequencing as well as number of genomes used for each specific analysis are indicated.

486

487 Supplementary figure S2: Map of Ghana showing the regional distribution of *Maf* isolates. The  
488 sizes of pie charts correspond to number of isolates from the respective regions.

489

490 Supplementary figure S3: Pairwise dN/dS of genes of six functional categories using all the 147 L5  
491 against the 67 L6 genomes. *esmac* – genes essential for growth in macrophages, *intmedres* – genes  
492 involved with intermediate metabolism and respiration, *lipmet* – genes involved with lipid  
493 metabolism, *virdetad* – genes involved with virulence, detoxification and adaptation, *cwallproc* -  
494 genes involved with cell wall and cell processes and *infopath* – genes involved with information  
495 pathways

496

497 Supplementary figure S4: Number of non-redundant SNPs within human T cell epitopes stratified  
498 by *Maf* lineage. No difference ( $X\text{-squared} = 0.0055391$ ,  $df = 1$ ,  $p\text{-value} = 0.9407$ ) between the  
499 proportion of nsSNPs between L6 (67 genomes) and L5 (mean values of 10 random samples of size  
500 = 67 with replacement)

501

502 Supplementary table S5: Mutated Human T cell antigens and epitopes of *Maf* with mutations  
503 stratified by lineage

504



505 Supplementary figure S6: Number of epitopes with and without nsSNPs stratified by Lineage 5  
506 with patient ethnicity (a). Number of non-redundant SNPs in epitopes stratified by ethnicity of L5  
507 infected patients (b). (The values for the non-Ewe associated L5 are mean estimates of 10 random  
508 samples of size 15 with replacement)

509

510 Supplementary figure S7: Uniform distribution of L5 isolated from ethnic Ewe TB patients among  
511 the L5 clade.

512

513 Supplementary data S8: Genomes and accession numbers of *Maf* from Ghana.

514

## 515 **Methods**

### 516 **Ethical Statement and Participant Enrollment**

517 The study and its protocols were reviewed by the Scientific and Technical Committee and  
518 approved by the Institutional Review Board (IRB) of the Noguchi Memorial Institute for Medical  
519 Research, Legon-Ghana with Federal Wide Assurance number FWA00001824.

520

### 521 ***Mycobacterium africanum* Strains**

522 Isolates used for this study were cultivated from July 2007 to November 2014 in Ghana<sup>9,12</sup>, West  
523 Africa, involving consecutive sputum smear positive pulmonary TB cases recruited from two  
524 different studies with isolates spanning four regions of Ghana (three in the south and one from the  
525 North) (supplementary figure S2).

526

### 527 **Mycobacterial Sub-Culturing and Chromosomal DNA Extraction**

528 *Mycobacterium africanum* strains were revived by sub-culturing on Lowenstein Jensen (LJ) slants;  
529 one supplemented with 0.4% sodium pyruvate the other with glycerol to enhance the growth of  
530 Lineage 5 and Lineage 6 strains of respectively. The cultures were incubated at 37 °C and  
531 monitored regularly until growth was observed. When confluence was achieved, five loops full of  
532 colonies were fetched into 2 mL cryo-vials containing 1 mL of sterile nuclease-free water, heat-  
533 inactivated at 98 °C for 60 minutes for DNA extraction using a hybrid DNA extraction protocol<sup>42</sup>.  
534 The isolates were confirmed MTBC by PCR amplification of IS6110, genotyped as *Maf* by large  
535 sequence polymorphism (LSPs) detecting region of difference (RD) 9 and 12<sup>43</sup>. Lineage  
536 identification was achieved by spoligotyping as previously described<sup>44</sup>. Strains confirmed as  
537 belonging either L5 or L6 were sequenced by the illumina platform at the Wellcome Trust Sanger  
538 Institute, United Kingdom.

539

### 540 **DNA Sequencing, Mapping of Sequence Reads, Variance Calling and Generation of Whole**

## 541 **Genome Fasta files**

542 Samples were sequenced as multiplexed libraries on the Illumina HiSeq platform to produce paired  
543 end reads of 125 nt in length. Genomes provided by the Research Center Borstel was obtained by  
544 sequencing DNA libraries prepared with the Nextera XT kit and run on Illumina MiSeq (250 and  
545 300 bp, paired end) and NextSeq (150 bp, paired end) according to the manufacturer's instruction  
546 (Illumina, San Diego, USA). The FastQ files containing the raw paired-end reads were processed  
547 using a python pipeline developed in house as follows. The reads were first adapter- and quality-  
548 trimmed with Trimmomatic v0.33<sup>45</sup>. Reads lower than 20 bp were not kept for the downstream  
549 analysis. Overlapping paired-end reads were then merged with SeqPrep  
550 (<https://github.com/jstjohn/SeqPrep>). The resulting filtered reads were mapped to a hypothetical  
551 reconstructed MTBC ancestor<sup>26</sup> with BWA v0.7.12<sup>46</sup>. Duplicated reads were marked by the  
552 MarkDuplicates module of Picard v 2.1.1 (<https://github.com/broadinstitute/picard>). The  
553 RealignerTargetCreator and IndelRealigner modules of GATK v.3.4.0  
554 (<https://software.broadinstitute.org/gatk/download/archive>) were used to perform local realignment  
555 of reads around indels. SNPs were called with Samtools v1.2  
556 (<https://sourceforge.net/projects/samtools/files/samtools/1.2/>) and VarScan v2.4.1<sup>47</sup> using the  
557 following thresholds: minimum mapping quality of 20, minimum base quality at a position of 20  
558 and minimum read depth at a position of 7X. SNPs were considered fixed at a frequency of  $\geq 90\%$   
559 and alleles were considered ancestral when the SNP frequency was  $\leq 10\%$ . Furthermore, SNPs were  
560 called only if the alternative basecall was supported by at least five reads and without strand bias.  
561 All variants were annotated using snpEff v4.11<sup>48</sup>, in accordance with the *M. tuberculosis* H37Rv  
562 reference annotation (AL123456.3). SNPs falling in regions with at least 50 bp identity to other  
563 regions in the genome were excluded from the analysis.

564

## 565 **Generation of Variable Positions and Phylogenetic Analysis**

566 The variable SNPs alignment was obtained by concatenating the SNP calls present in the variant

567 calling file of each genome, using the IUPAC nucleotide ambiguity codes for heterozygous calls. A  
568 position was considered variable if at least one genome had a SNP at that position. Called deletions  
569 and positions not called according to the minimum threshold of 7 were encoded as gaps. Positions  
570 for which the proportion of gaps exceeded 50% were excluded from the alignment. Maximum  
571 likelihood phylogeny of the variable positions with 1000 bootstraps was then generated using  
572 RAxML version 8.2.3<sup>49</sup> with GTR substitution matrix and other default settings with the final tree  
573 evaluated and optimized under GAMMA with accuracy of 0.1 Log likelihood units. The best tree  
574 was then, rooted on *M. canettii* and annotated using figtree  
575 (<http://www.webcitation.org/getfile?fileid=27177ee8dd2f34cfd254b9c5e6c6fd4b65329f6>).

576

577 **Comparative genomics analysis of isolates using genes encoding proteins of 8 functional**  
578 **categories.**

579 Experimentally confirmed human MTBC T cell epitope (1,226 epitopes) sequences (spanning 304  
580 antigens with some overlapping sequences) retrieved from the Immune Epitope Database (IEDB),  
581 tested in human T cell assays, with no major histocompatibility complex (MHC) restrictions and  
582 have genomic coordinates in the H37Rv reference strain<sup>32,8</sup> were *in silico* extracted from the fasta  
583 whole genome files and concatenated excluding sequence redundancy using customized bash  
584 algorithms. Complementary sequences of epitopes encoded by the reversed strand were first  
585 transcribed before the concatenation to have all the sequences in the same direction. In addition,  
586 MTBC genes of other seven functional categories namely those encoding regulatory proteins  
587 (regprot; 196), genes involved with lipid metabolism (limpet; 267), genes involved with  
588 intermediate metabolism (intmedres; 917), genes involved with virulence, detoxification and  
589 adaptation (virdetad; 216), genes involved with information pathways (infopath; 234), genes  
590 involved with cell wall and cell processes (cwallproc; 768) and genes essential for growth in  
591 macrophages (esmac; 125) according to the tuberculist database<sup>50</sup> were also retrieved and  
592 concatenated as described above excluding genes involved with drug resistance.

593

## 594 *Estimation of Pairwise Nucleotide Diversity*

595 Pairwise SNP distances of the whole genome excluding sites associated with drug resistance,  
596 concatenates of T cell epitopes and the genes of other seven functional categories were calculated  
597 with the *dna.dist* function of *ape* package<sup>51</sup> of R version 3.2.3<sup>52</sup> as previously described<sup>8</sup>. Average  
598 pairwise nucleotide diversity per site ( $\pi$ ) and confidence intervals for the  $\pi$  was calculated as  
599 previously described<sup>8</sup> and plotted with *ggplot2* package implemented in R. The upper and lower  
600 levels of confidence were attained by estimating the 97.5<sup>th</sup> and 2.5<sup>th</sup> quantiles of the  $\pi$  distribution  
601 obtained by bootstrapping (1000 replicates) as previously described<sup>8</sup>. Non-overlapping confidence  
602 intervals of  $\pi$  were taken as evidence of statistically significant differences<sup>53,54</sup>. Details of the  
603 algorithm for this analysis are available upon request.

604

## 605 *Estimation of Pairwise dN/dS*

606 The concatenates of the human T cell epitopes and the other genes of seven functional categories  
607 were also used for estimation of dN/dS ratios stratified by lineage. As a follow up, dN/dS of T cell  
608 epitopes and regulatory proteins were also estimated for 15 L5 genomes from Ewe TB patients and  
609 77 from non-Ewe TB patients. The dN/dS estimates were calculated with all polymorphic sites  
610 within each lineage using the *kaks* function of the *seqinr* package<sup>55</sup> as previously described<sup>8</sup> and  
611 box plotted using *ggplot2* package in R version 3.2.3. Statistical difference of the estimates  
612 between the *Maf* lineages was accessed using the non-parametric Wilcoxon rank-sum tests with  
613 continuity correction in R version 3.4.0.

614

## 615 **Human T cell Epitopes with Non-Synonymous SNPs and Count of Non-Redundant SNPs**

616 Synonymous and non-synonymous mutations within the coordinates of each epitope were extracted  
617 from the variant calling file (VCF) obtained for each genome. The specific human T cell epitopes  
618 with non-synonymous SNPs were compared between the *Maf* lineages for lineage-specific mutated  
619 epitopes and *Maf*-specific mutated epitopes.

620 Furthermore, the number of pairwise non-redundant SNPs was estimated for the *Maf* lineages (67  
621 L6 genomes and the 10 random samples of L5 of equal size as L6) as well as L5 genomes stratified  
622 by patient ethnicity (15 L5 from Ewe patients and 10 random samples of L5 from non-Ewe TB  
623 patients of size 15) using Mega6<sup>56</sup>. The number of SNPs per each group was plotted and compared  
624 between the groups using the fisher's exact test for statistical significance in R version 3.2.3.  
625

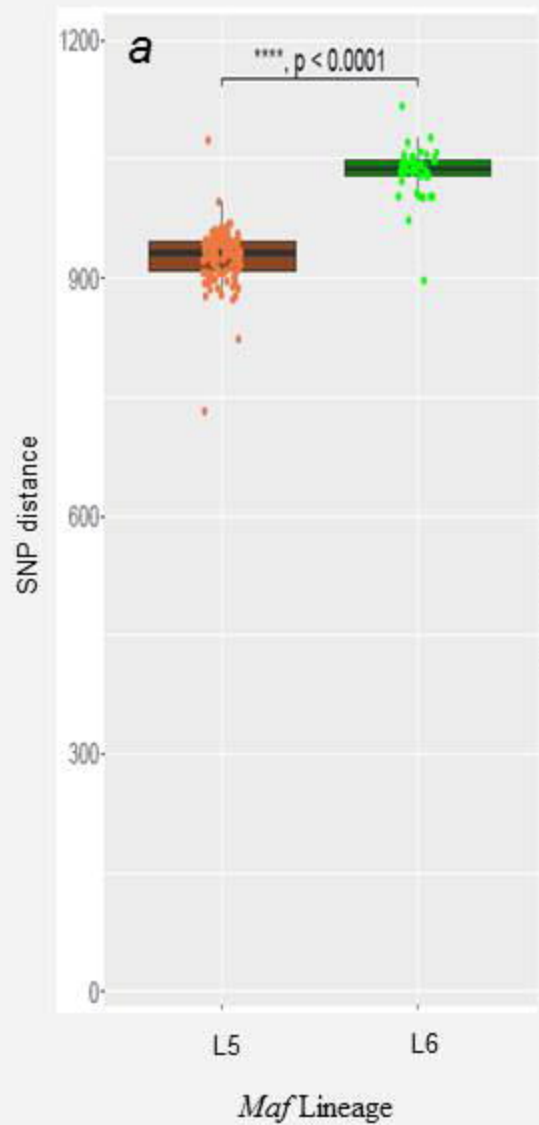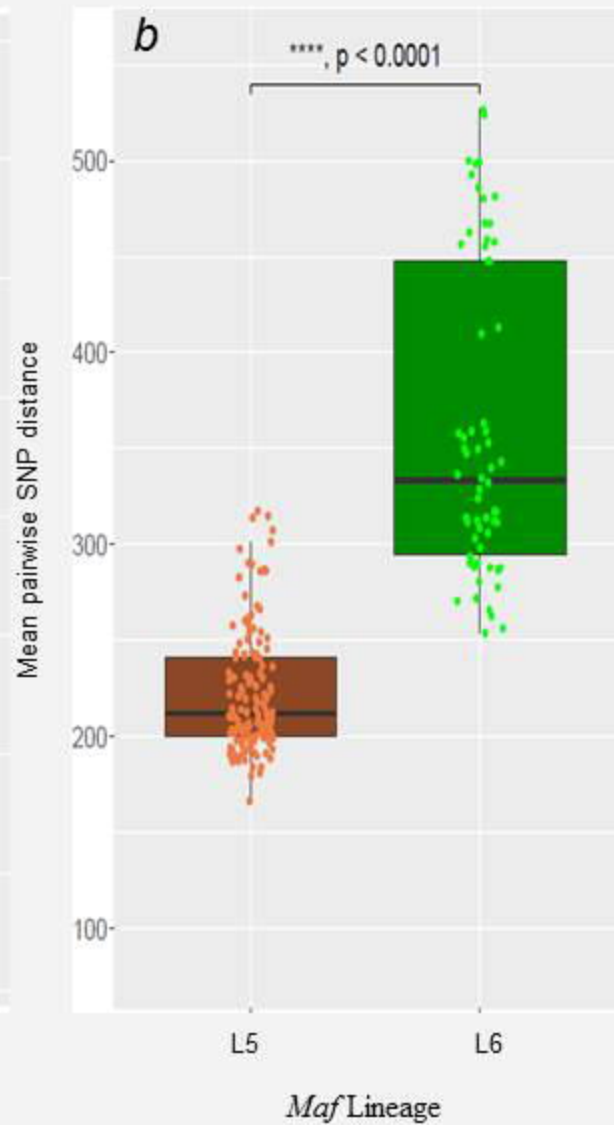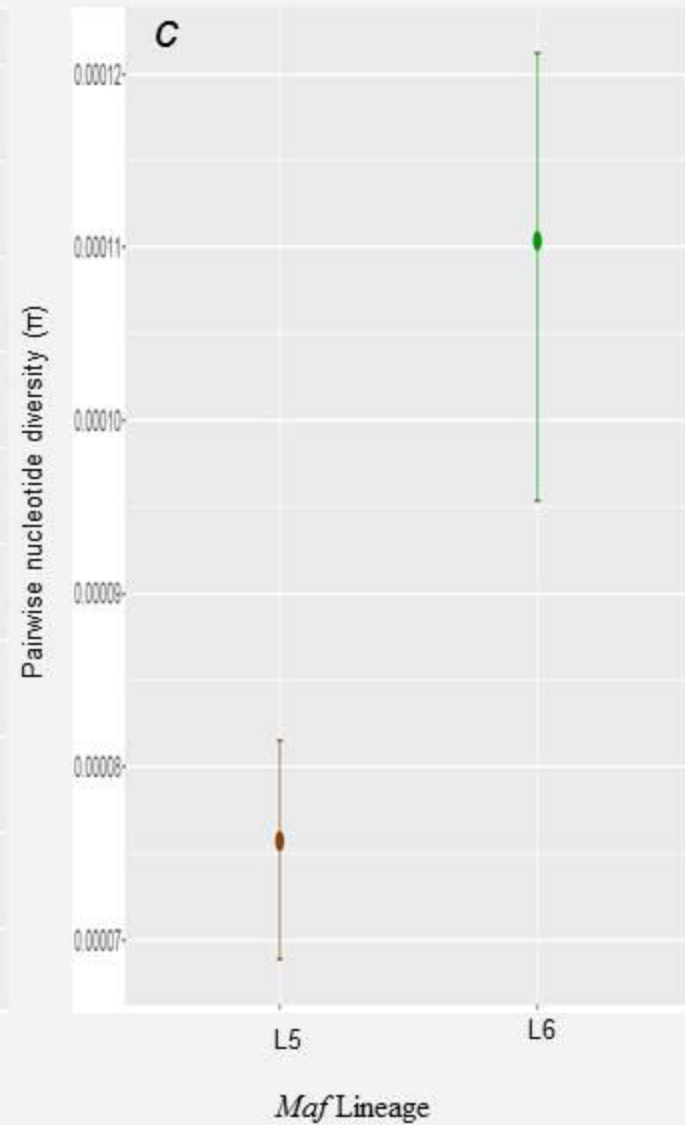

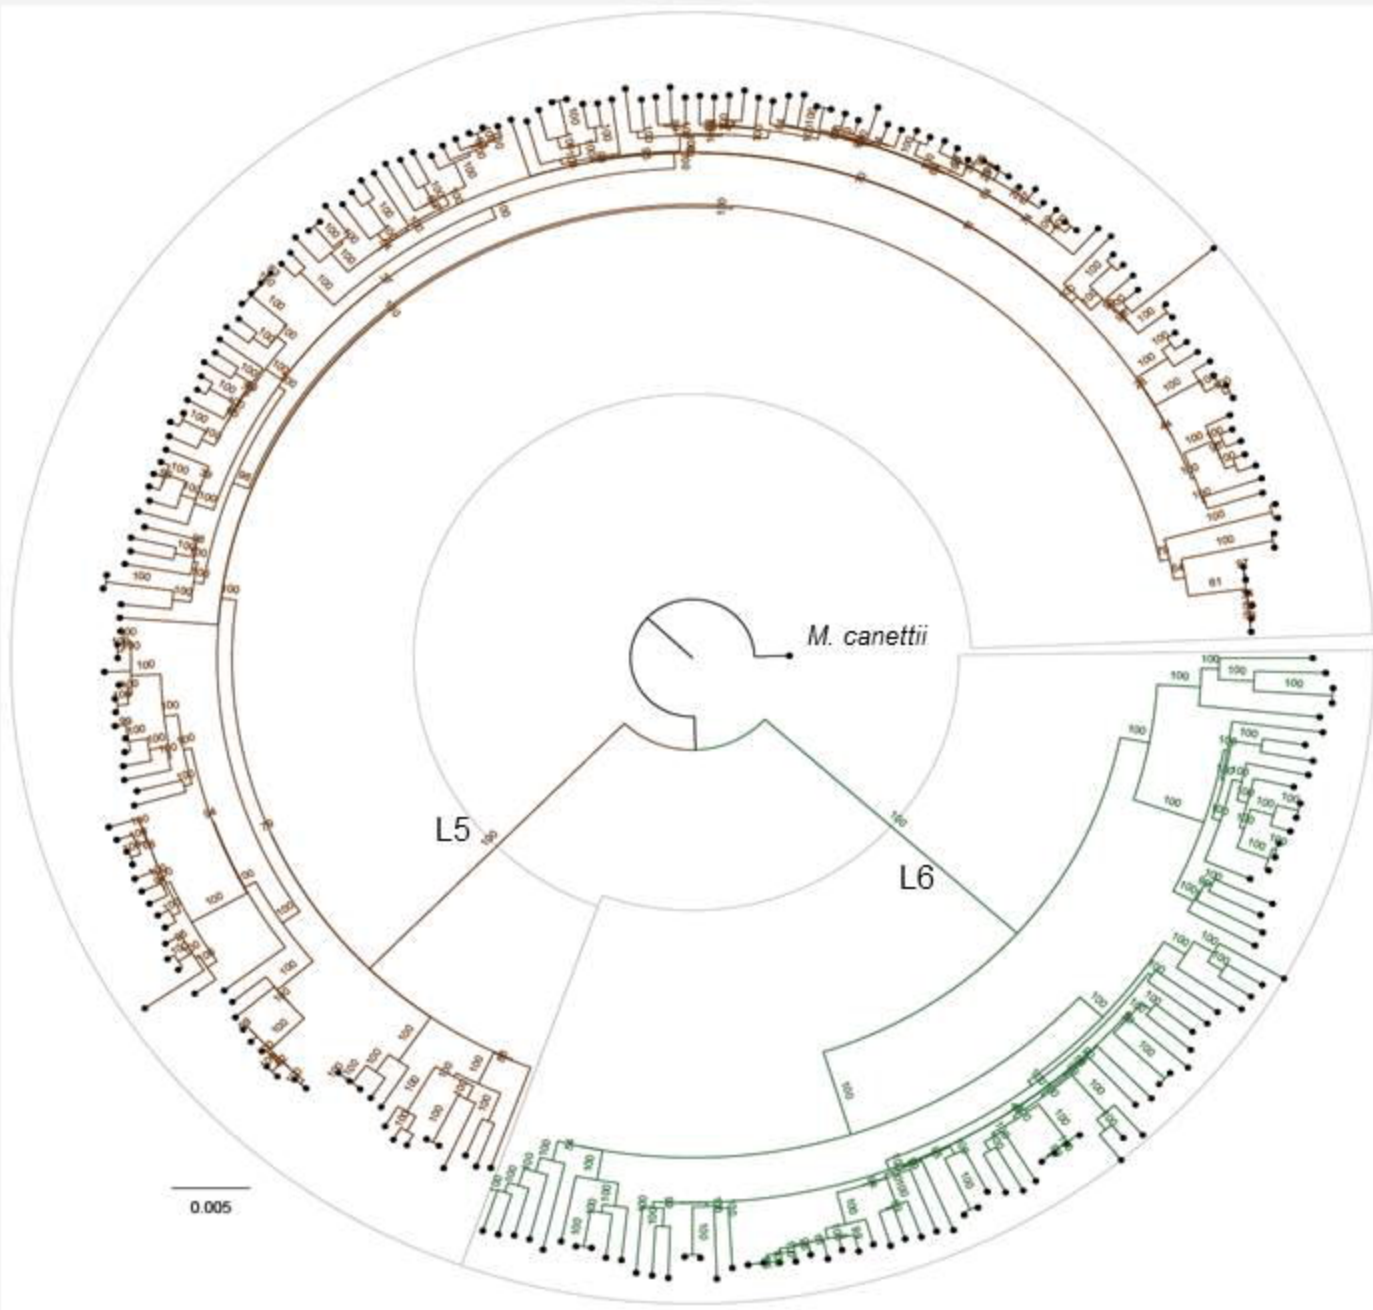



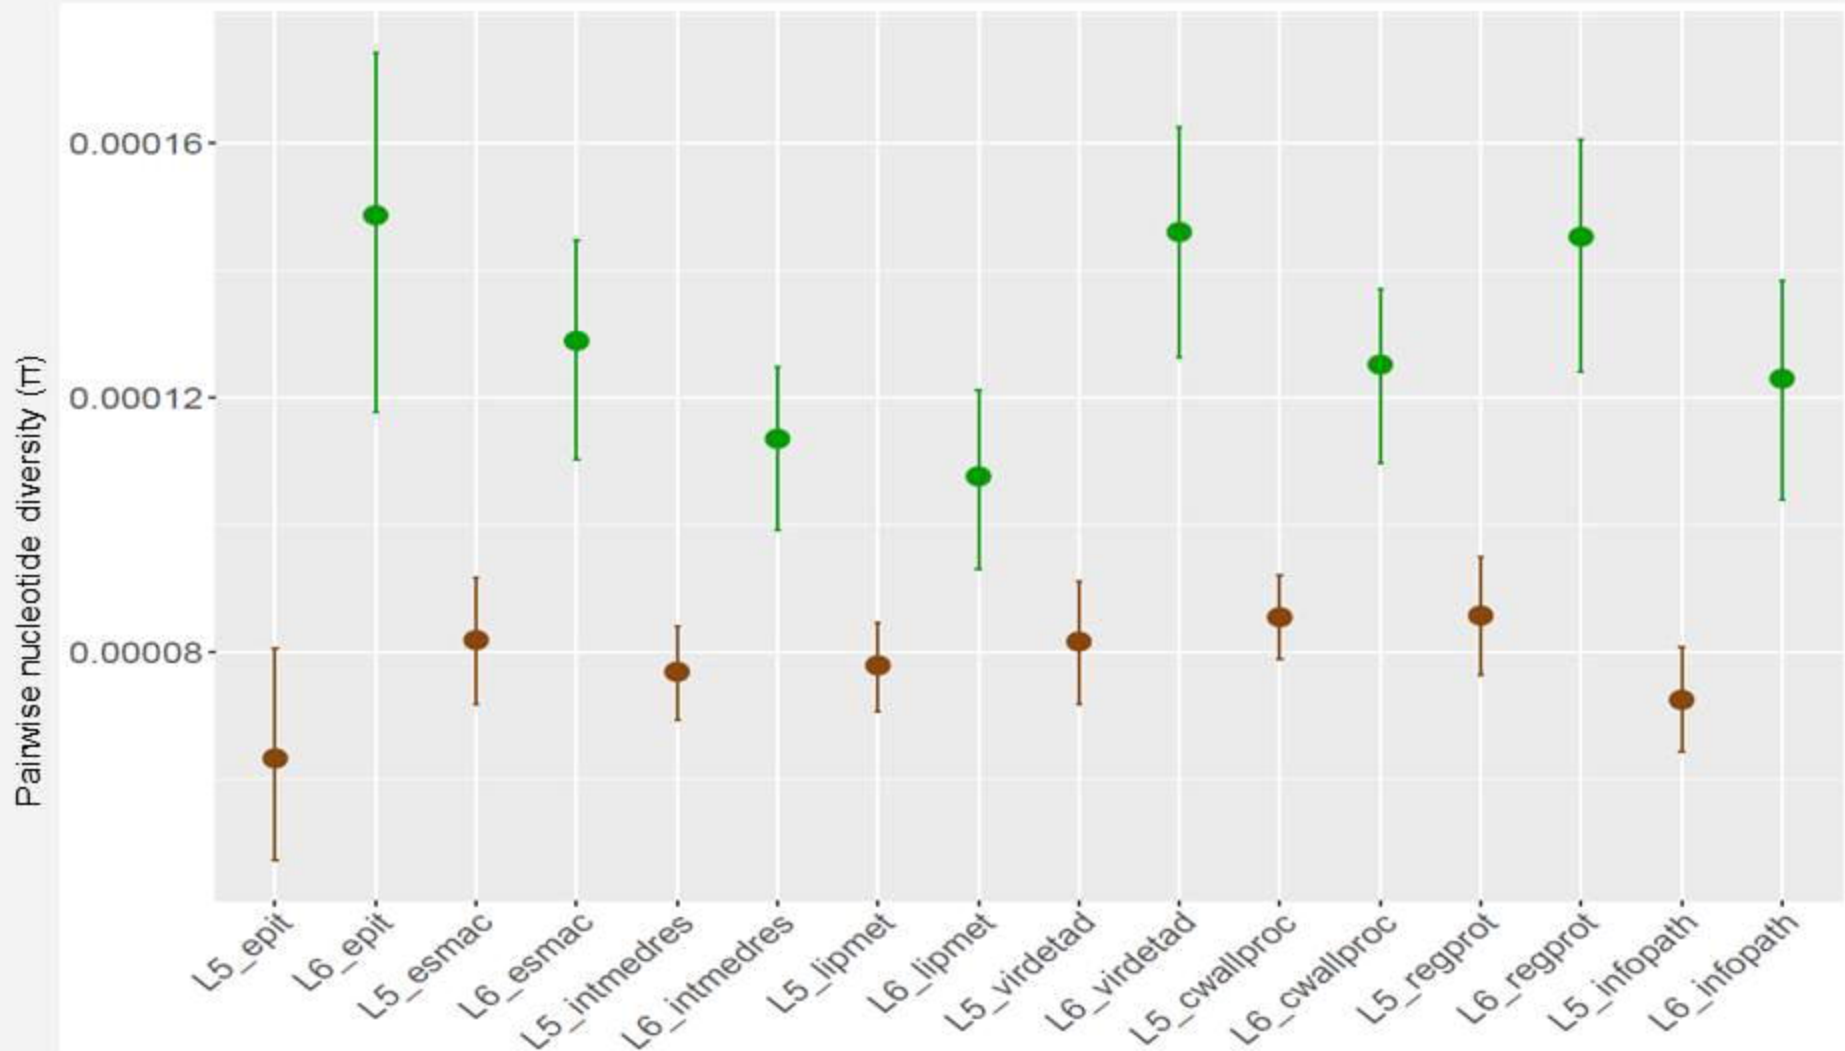

Eight functional categories of genes among Maf lineages

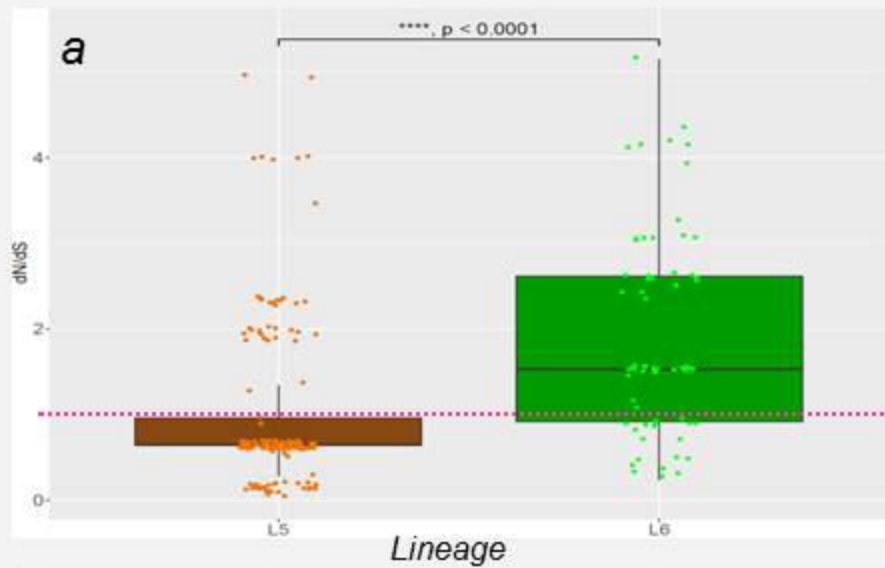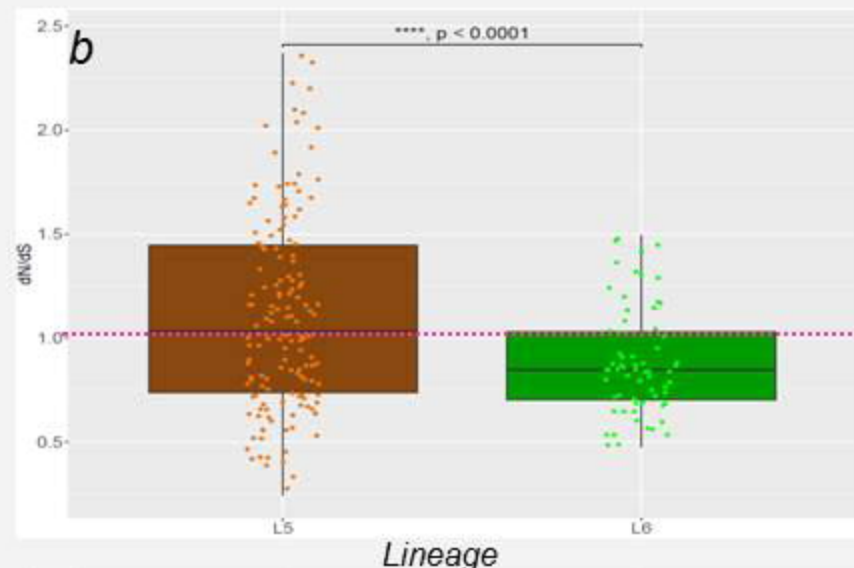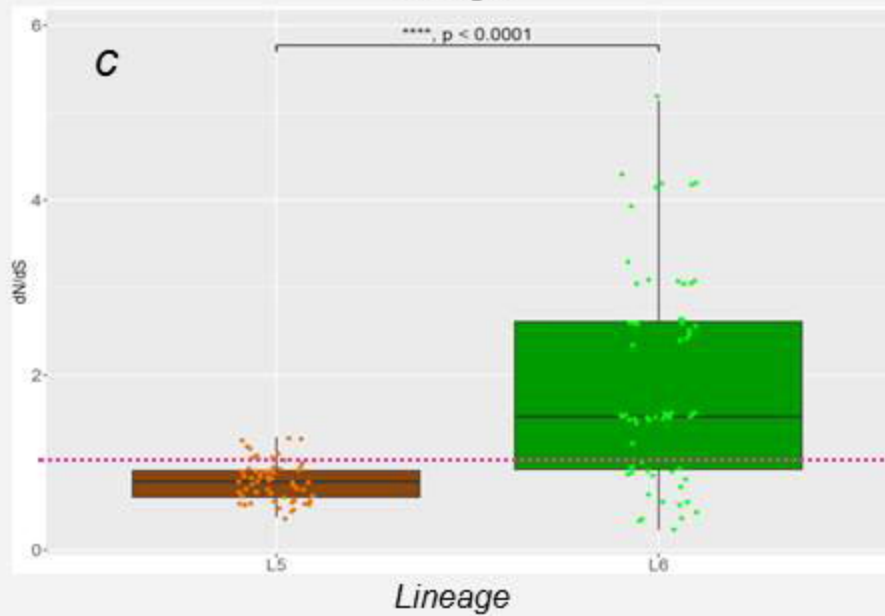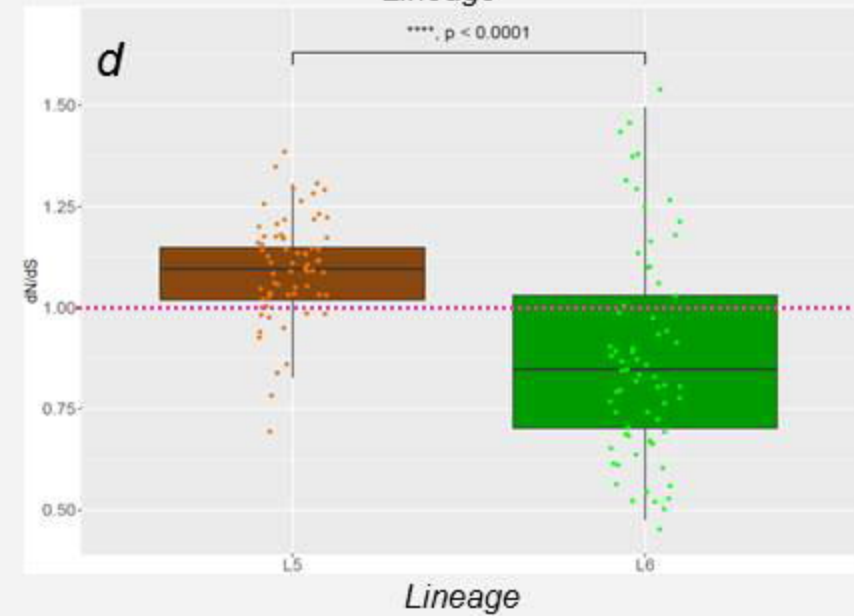

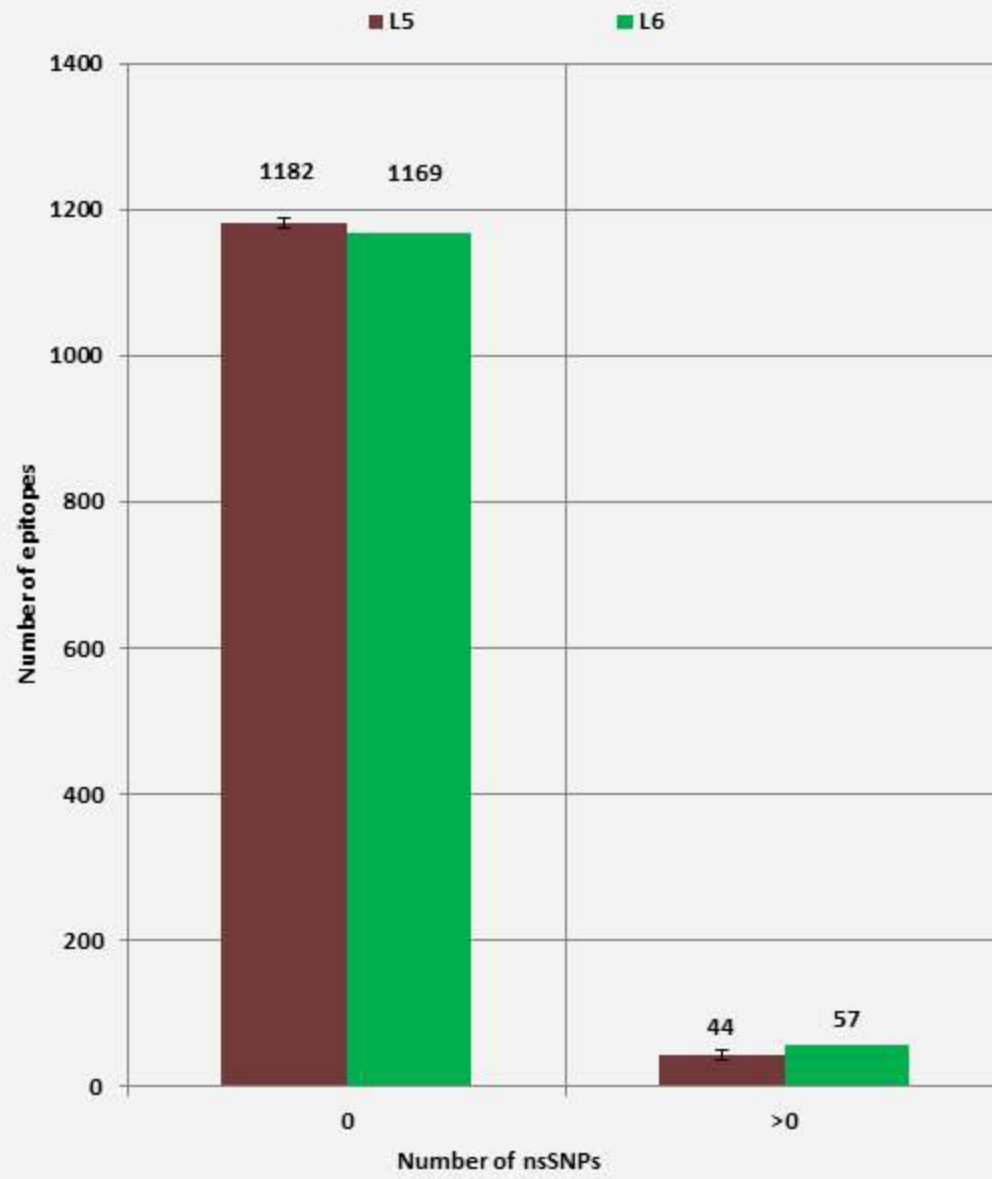

*a*

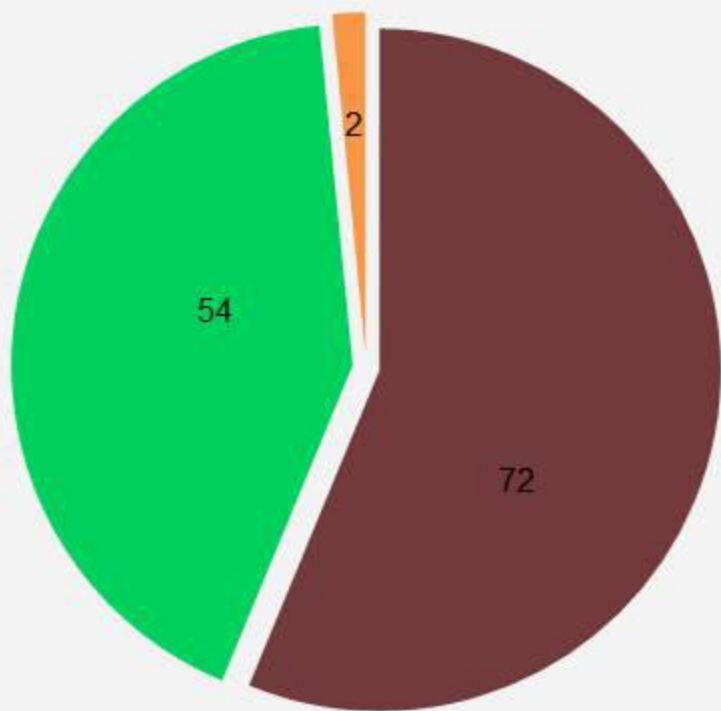

■ L5 ■ L6 ■ L5/L6

*b*

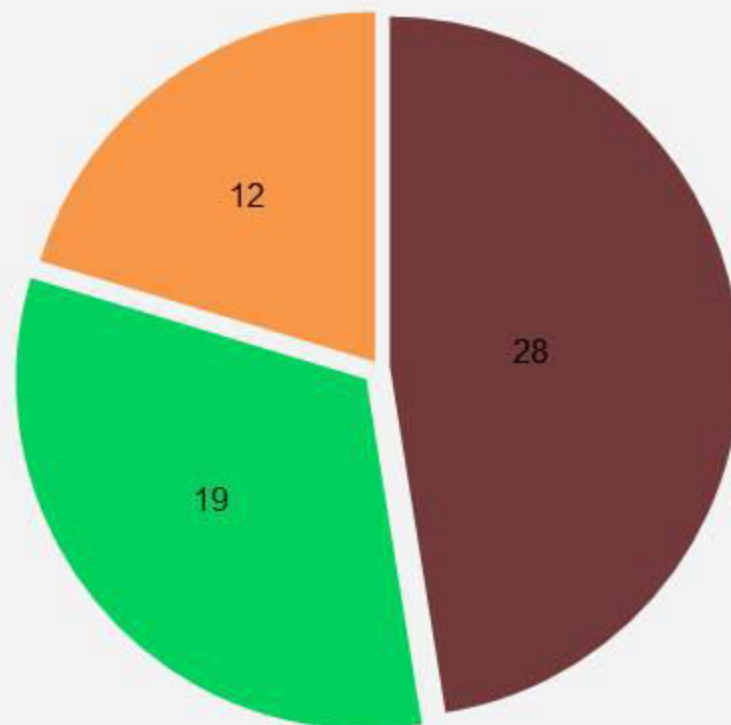

■ L5 ■ L6 ■ L5/L6

**a**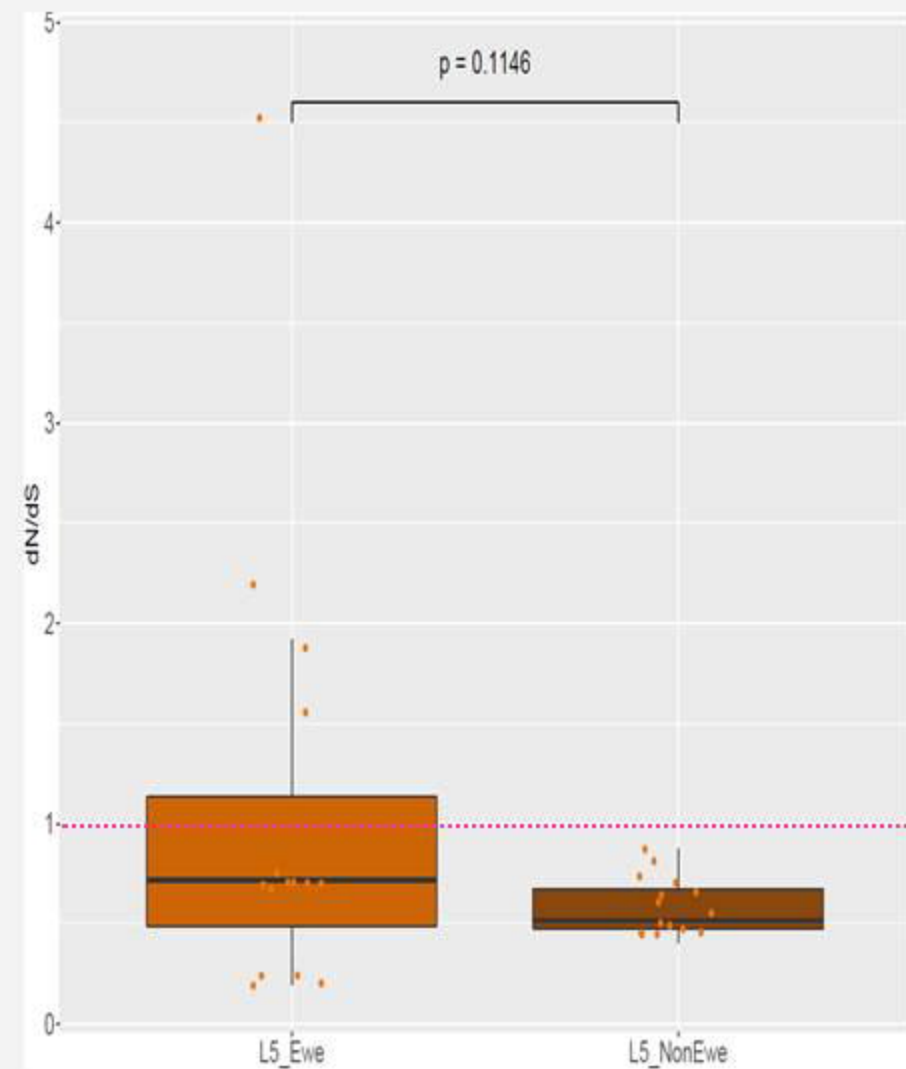*L5 with Ethnicity***b**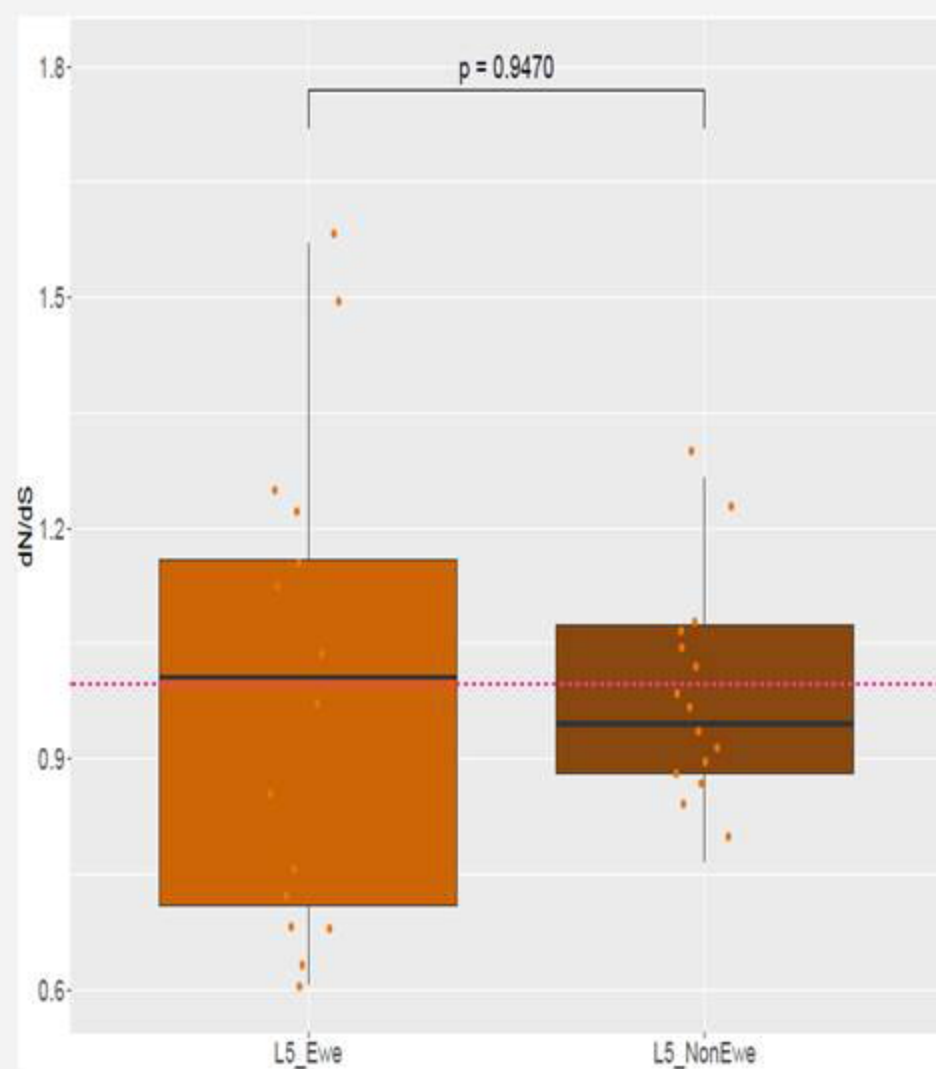*L5 with Ethnicity*

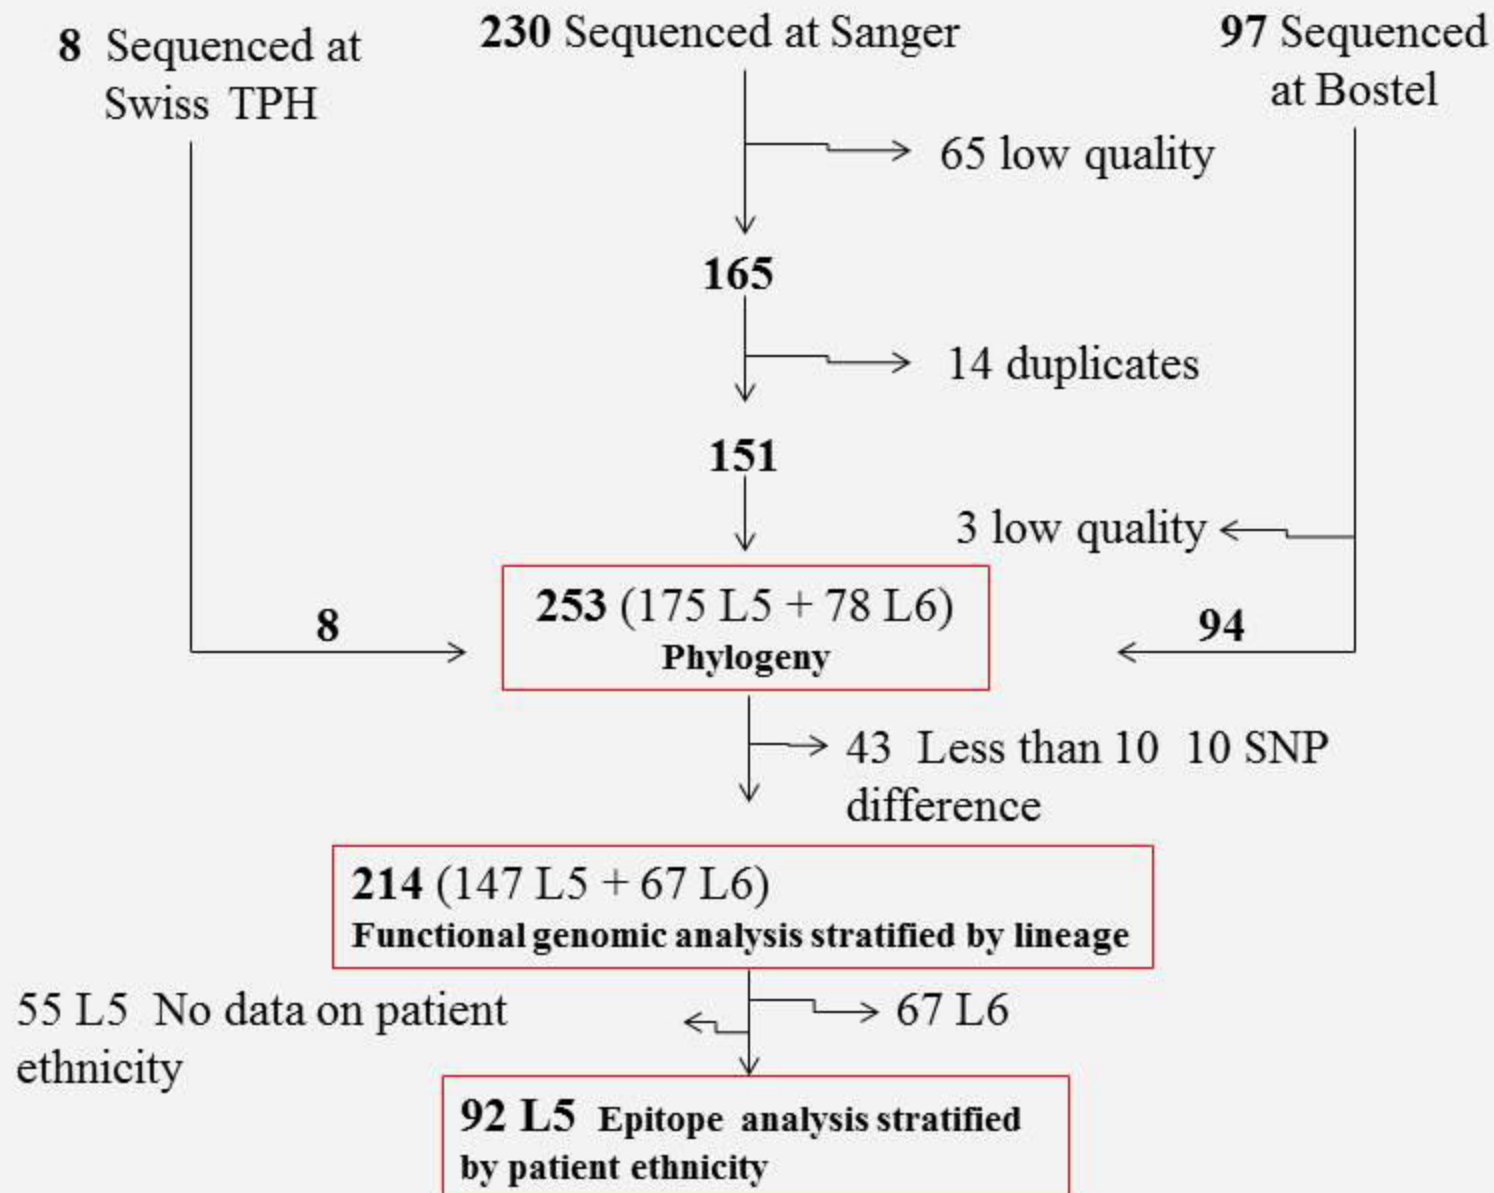

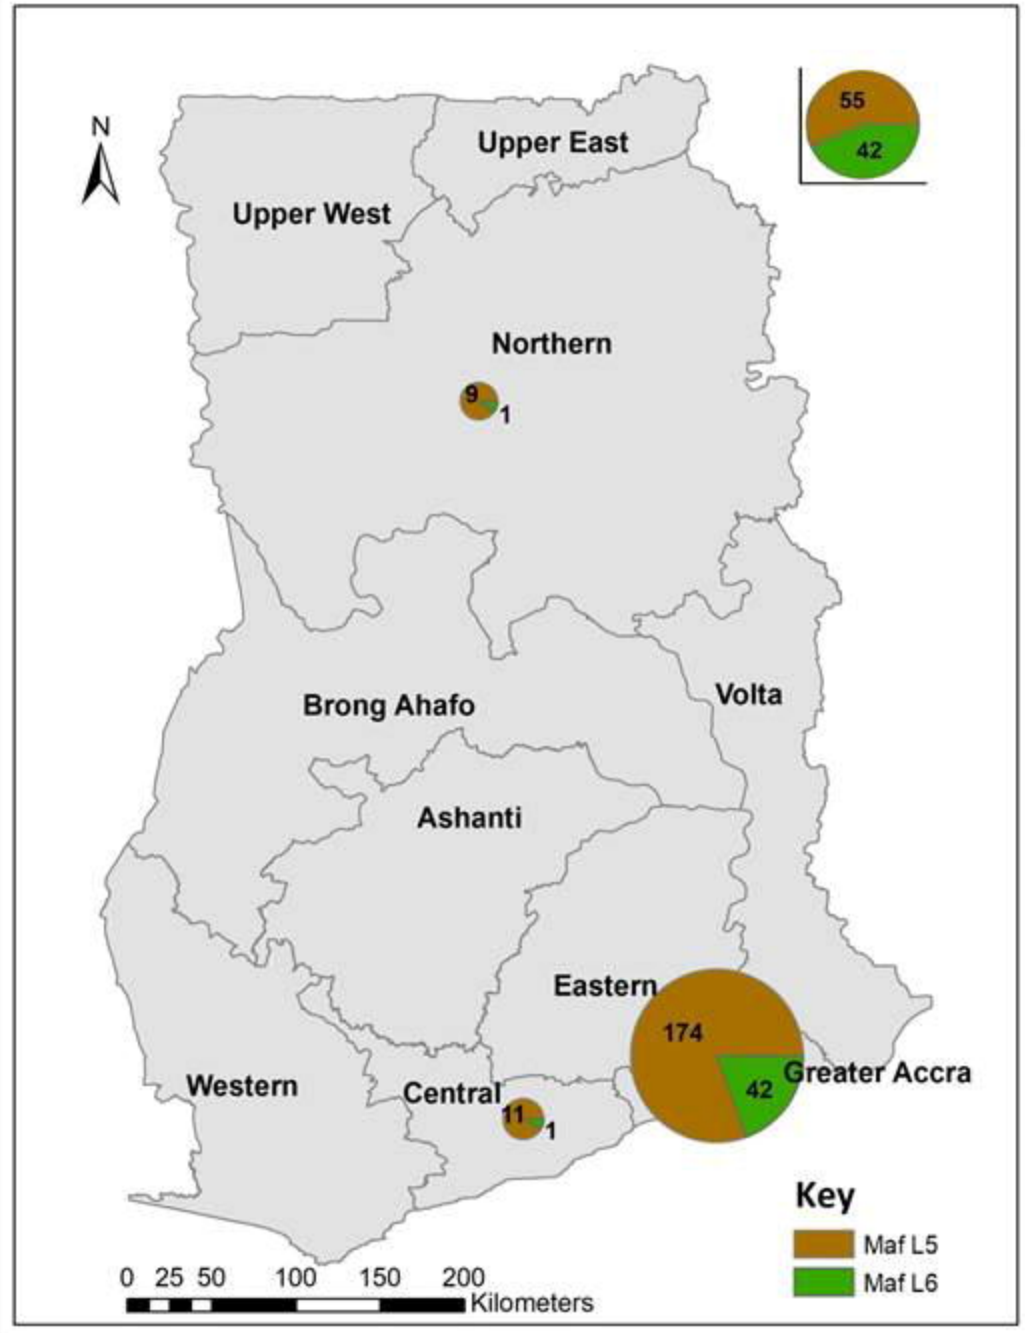

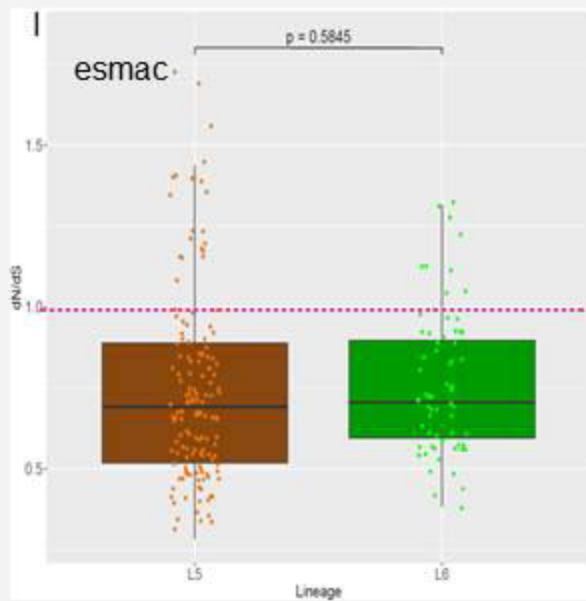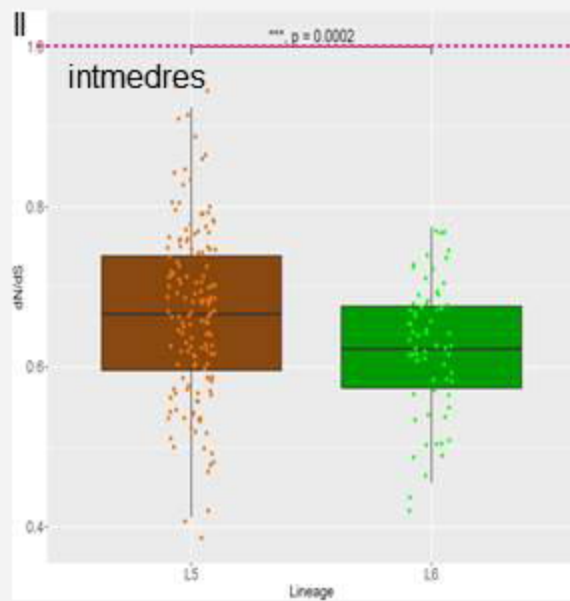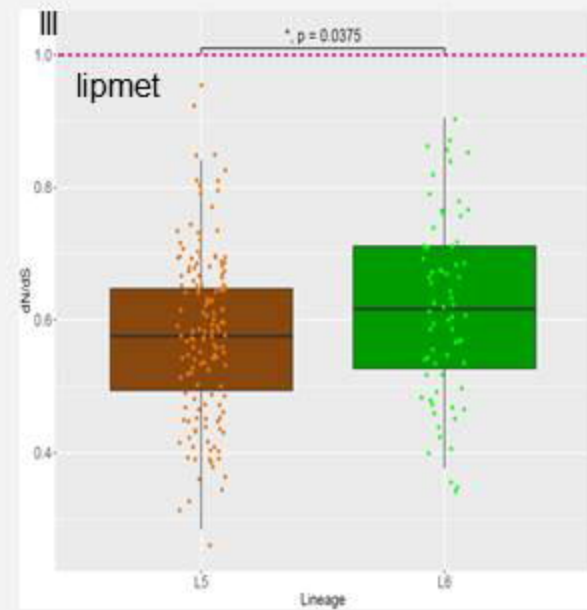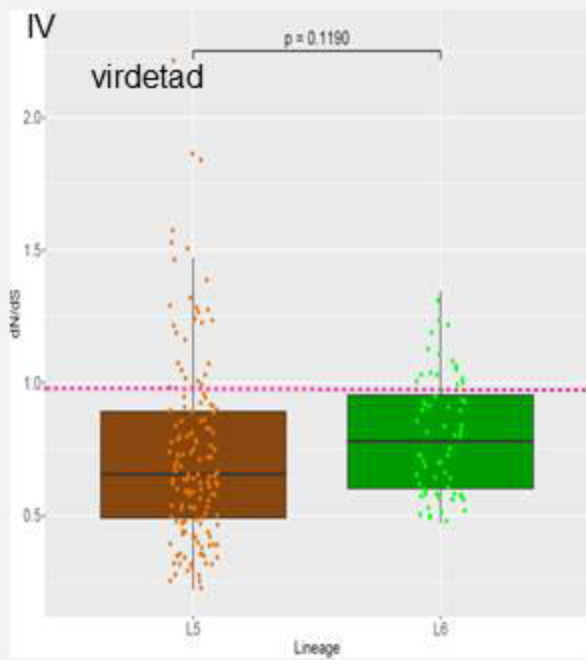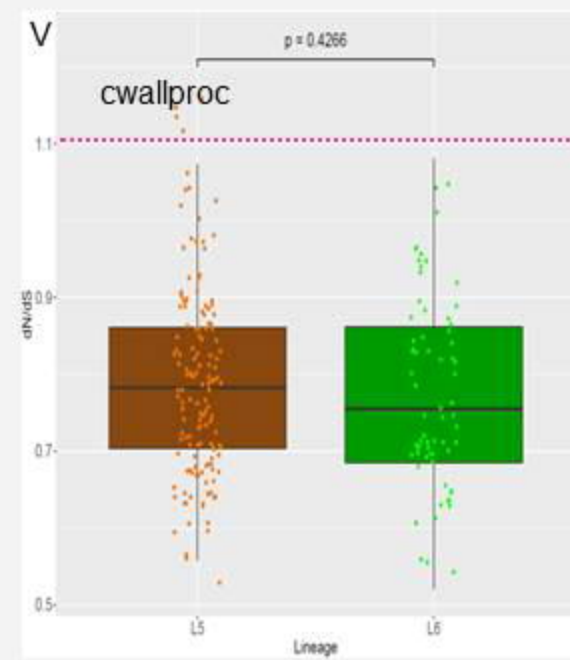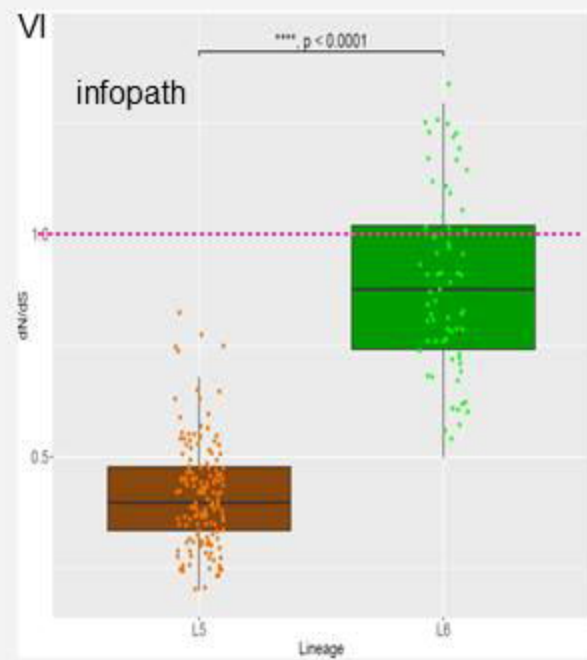



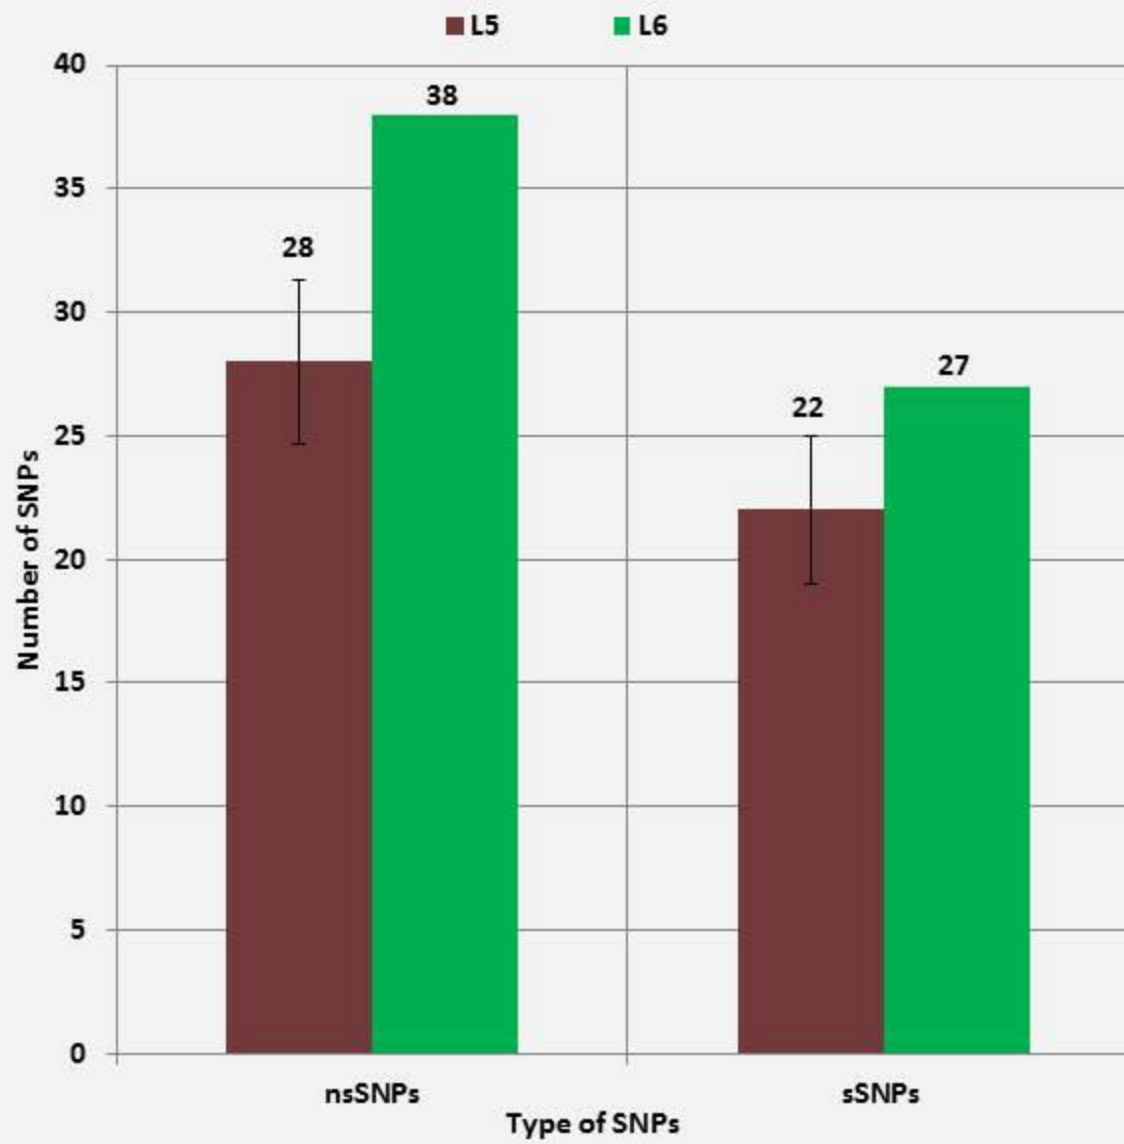

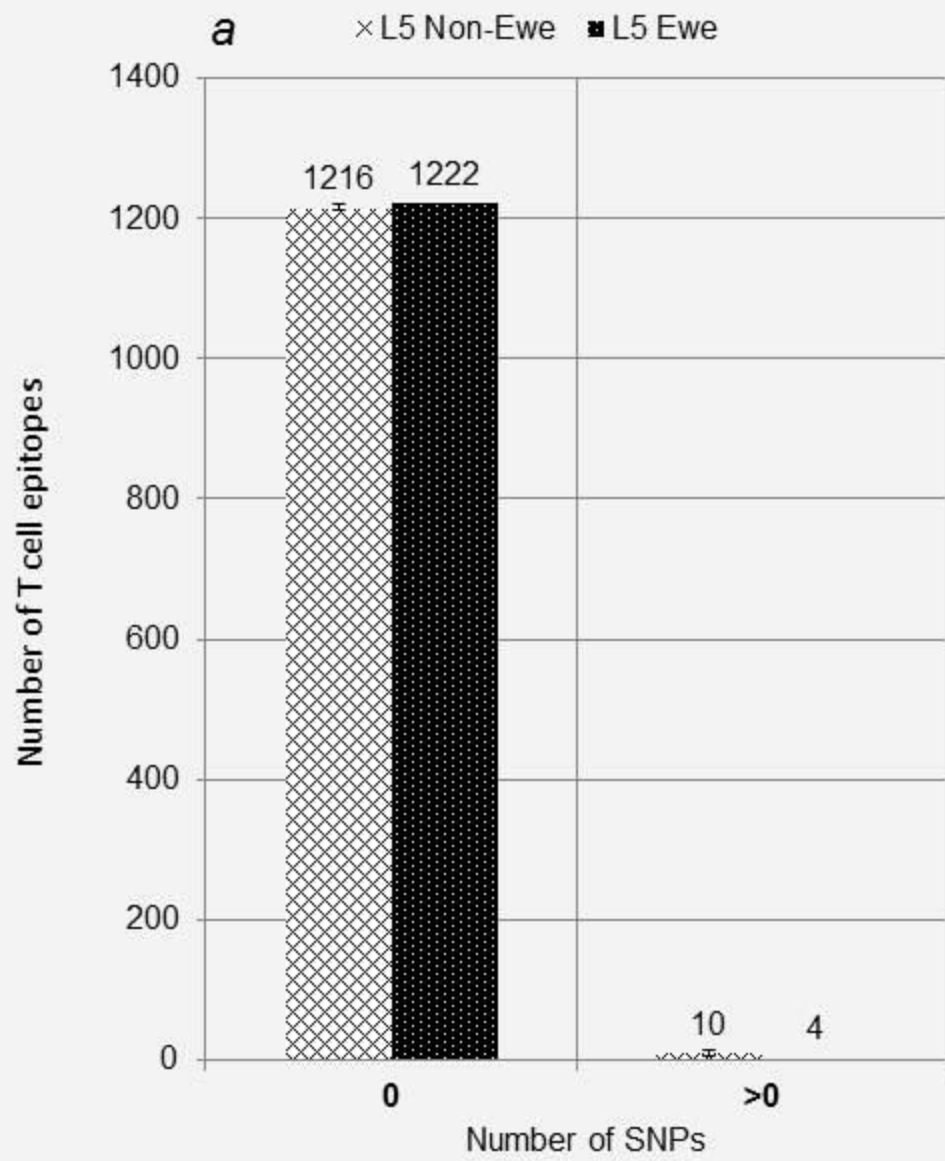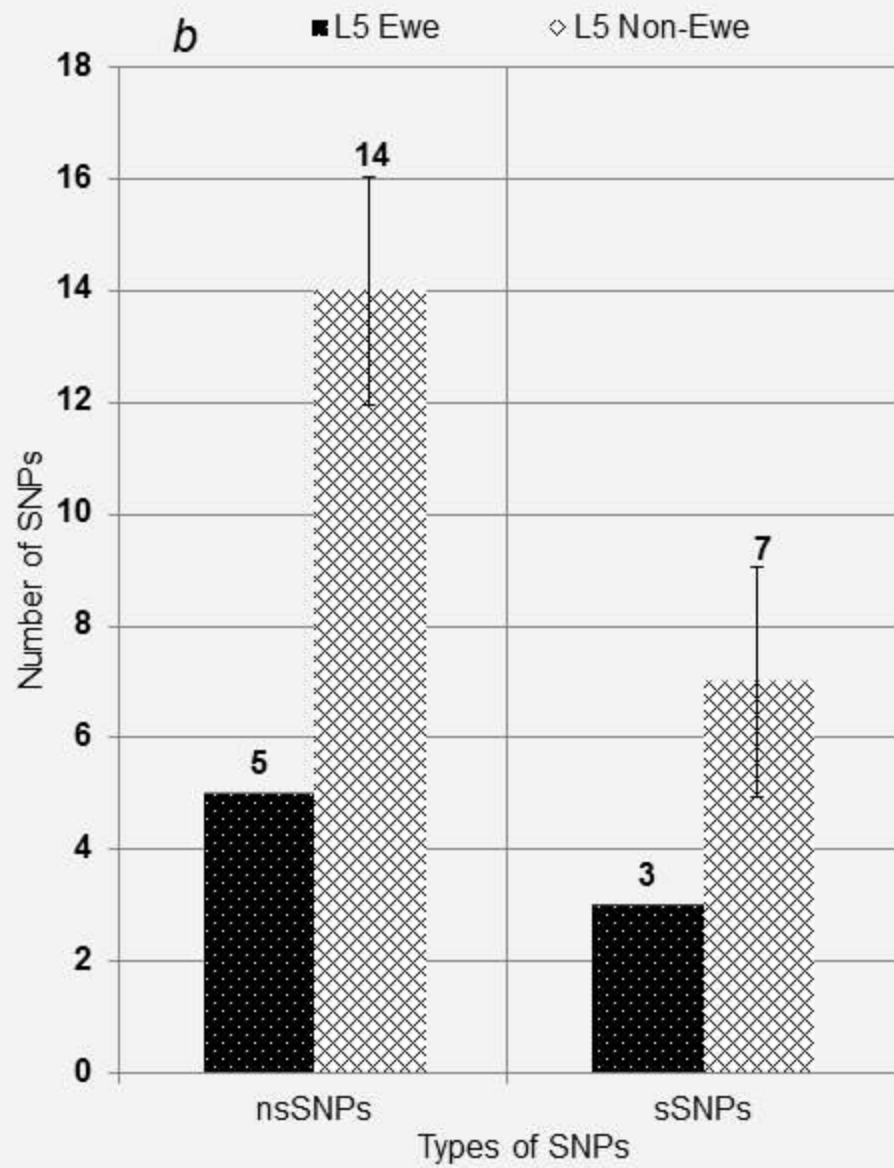

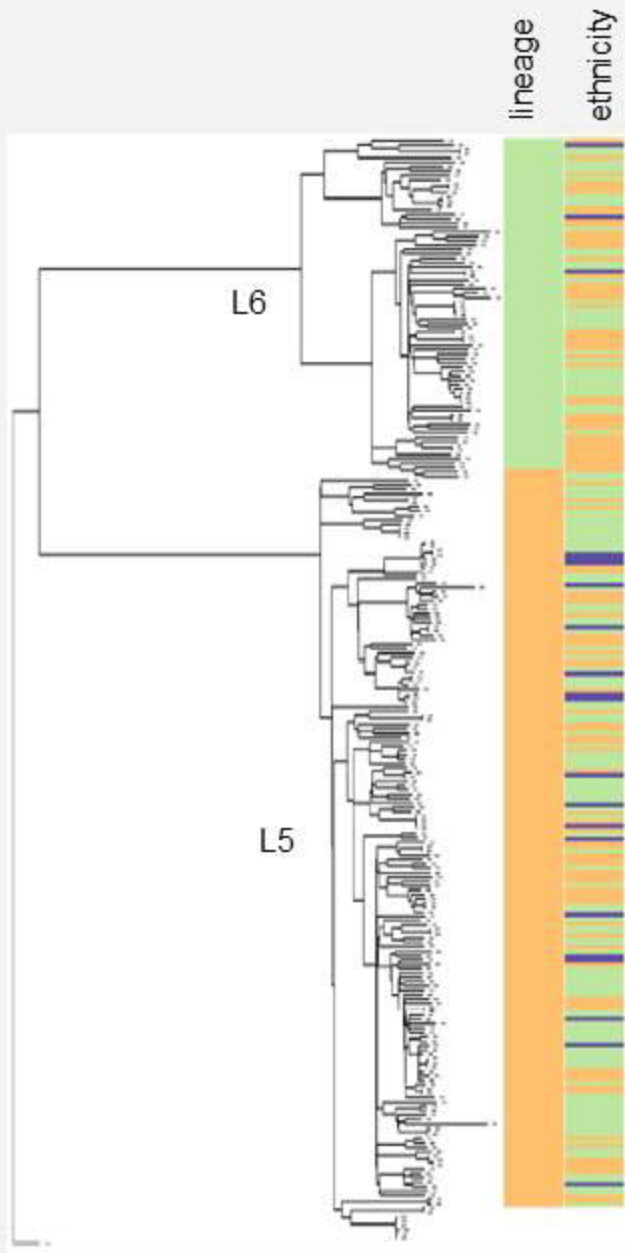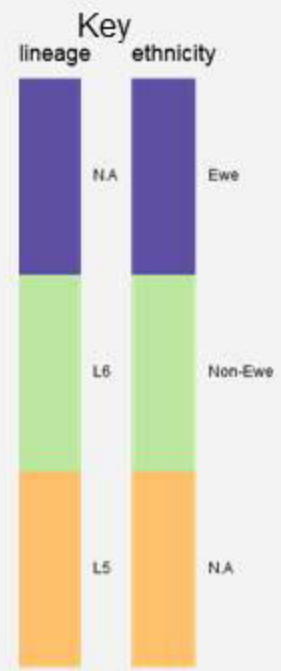

Source: http://biorxiv.org/content/10.1101/202234v1.full.pdf
